# Supplementary material for: Assessment of a Computational Protocol for Predicting Co-59 NMR Chemical Shift
Source: MDPI journal article supplement (doi:10.3390/magnetochemistry9070172), 2023-07-02
Supplement: s1 [file s1]

## SUPPLEMENTARY MATERIAL

# Assessment of a Computational Protocol for Predicting Co-59 NMR Chemical Shift

Matheus G. R. Gomes <sup>1</sup>, Andréa L. F. de Souza <sup>2</sup>, Hélio F. Dos Santos <sup>3</sup>, Wagner B. De Almeida <sup>4</sup> and Diego F. S. Paschoal <sup>1,\*</sup>

<sup>1</sup> NQTCM: Núcleo de Química Teórica e Computacional de Macaé, Polo Ajuda, Instituto Multidisciplinar de Química, Centro Multidisciplinar UFRJ-Macaé, Universidade Federal do Rio de Janeiro, Macaé 27971-525, RJ, Brazil; matheusgunar1@gmail.com

<sup>2</sup> LACASO: Laboratório de Catálise Aplicada e Síntese Orgânica, Departamento de Química Orgânica, Instituto de Química, Universidade Federal do Rio de Janeiro, Cidade Universitária, Rio de Janeiro 21941-909, RJ, Brazil; andrealuzia@iq.ufrj.br

<sup>3</sup> NEQC: Núcleo de Estudos em Química Computacional, Departamento de Química—ICE, Universidade Federal de Juiz de Fora, Campus Universitário, Juiz de Fora 36036-900, MG, Brazil; helio.santos@ufjf.br

<sup>4</sup> Laboratório de Química Computacional e Modelagem Molecular (LQC-MM), Departamento de Química Inorgânica, Instituto de Química, Universidade Federal Fluminense (UFF), Outeiro de São João Batista s/n, Campus do Valonguinho, Centro, Niterói 24020-141, RJ, Brazil; wbdealmeida@gmail.com

\* Correspondence: diegopaschoal01@gmail.com or diegofspaschoal@macae.ufrj.br

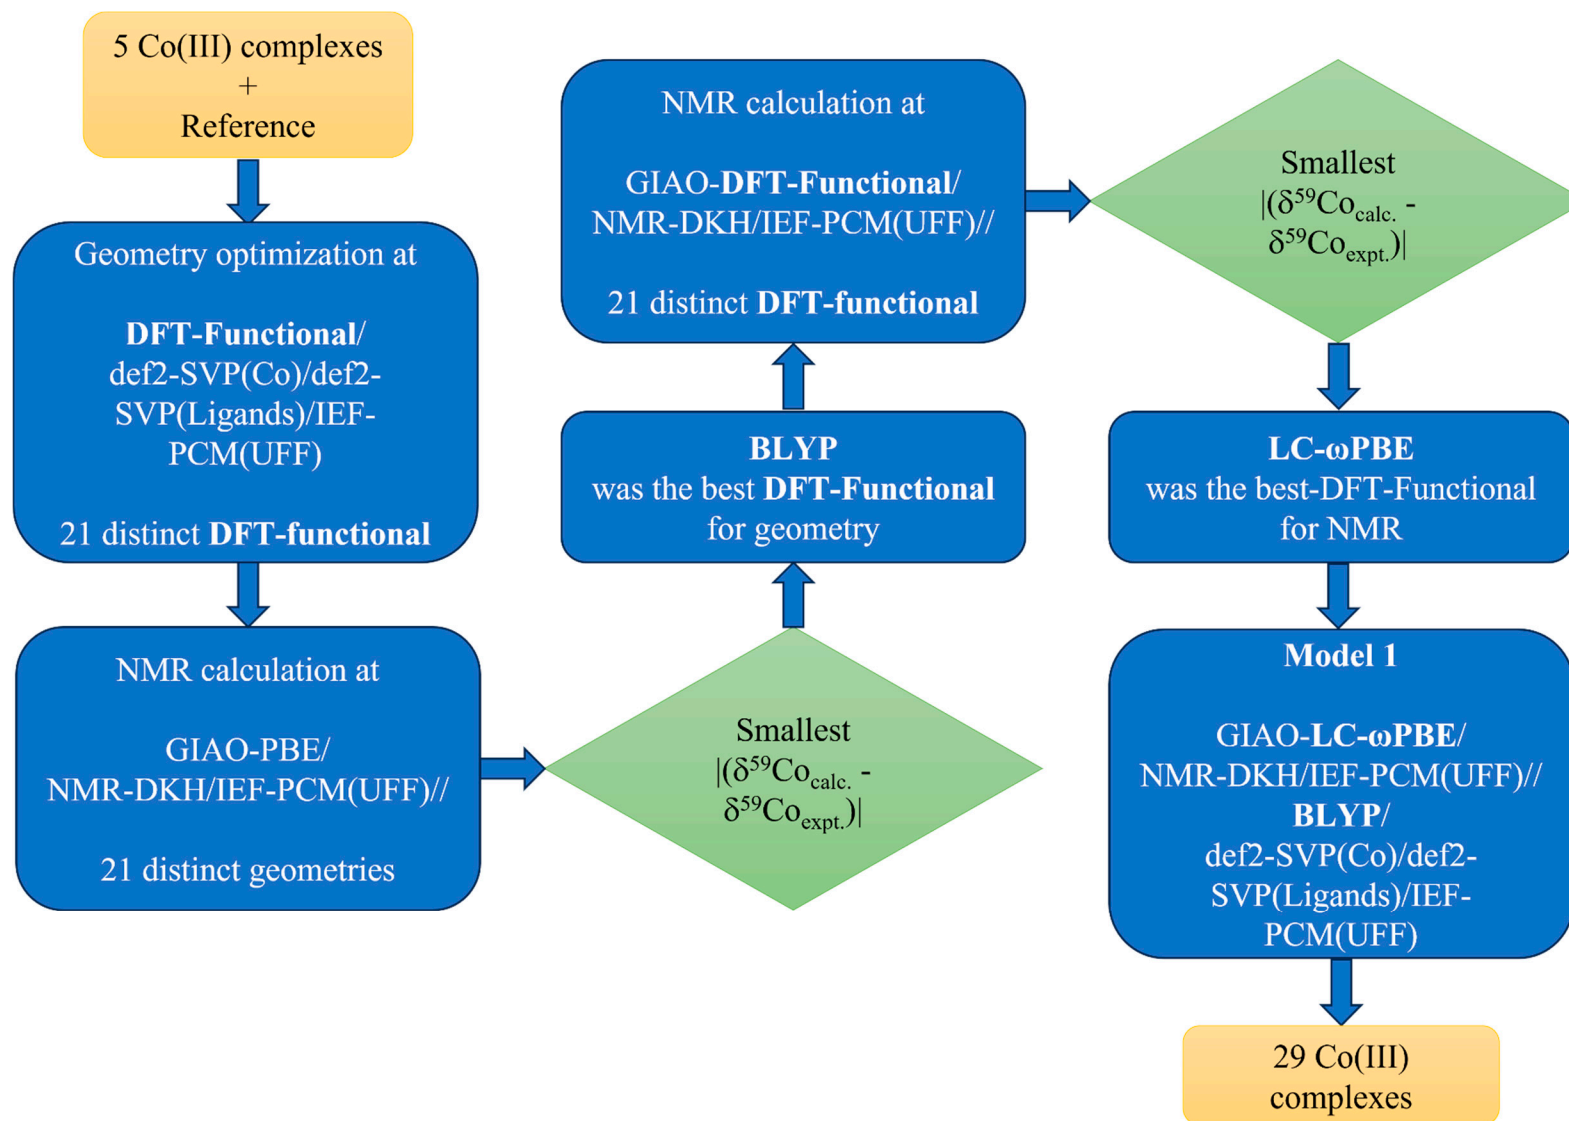

**Figure S1.** Benchmarking flowchart applied to obtain Model 1.

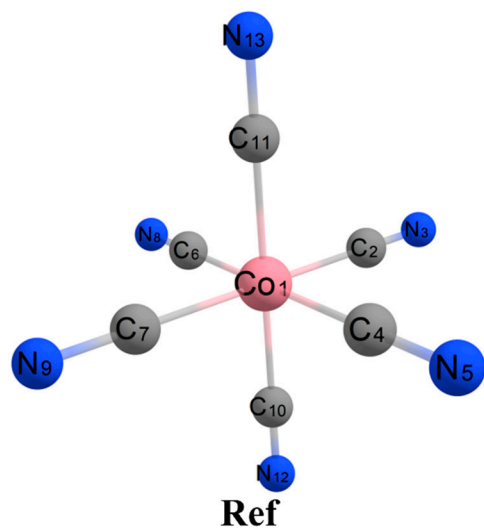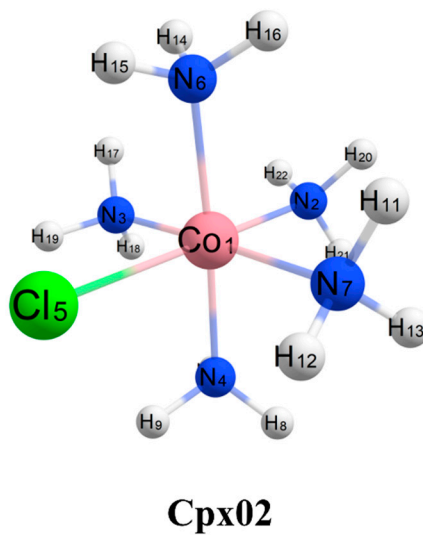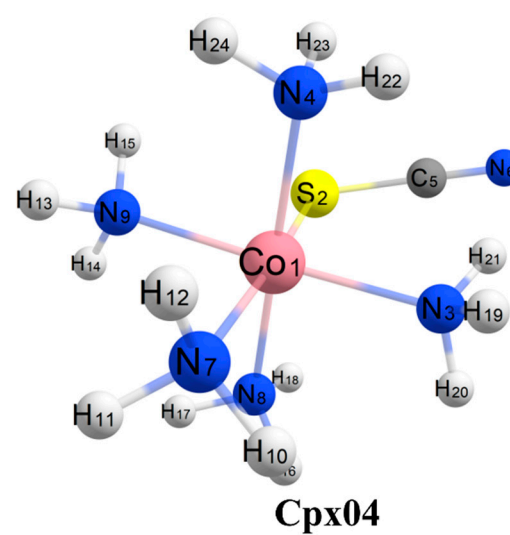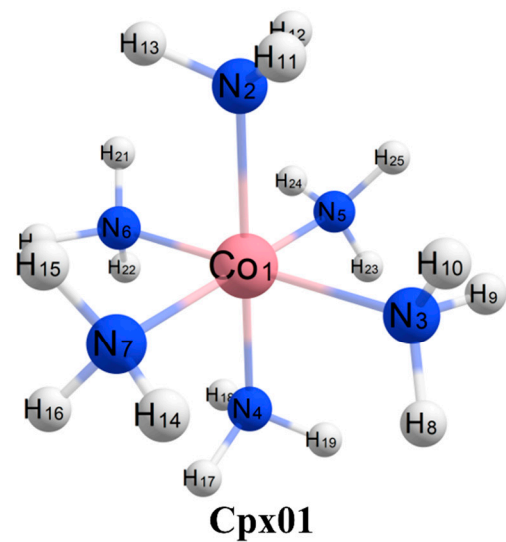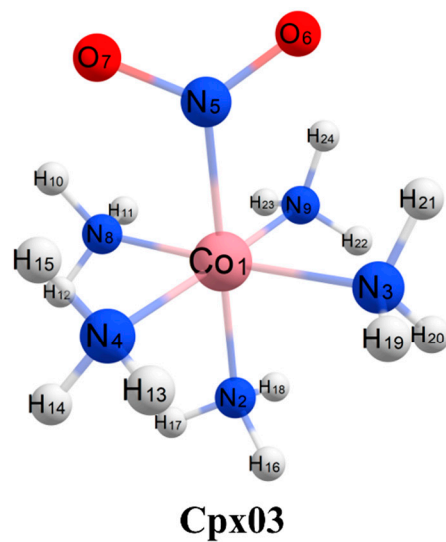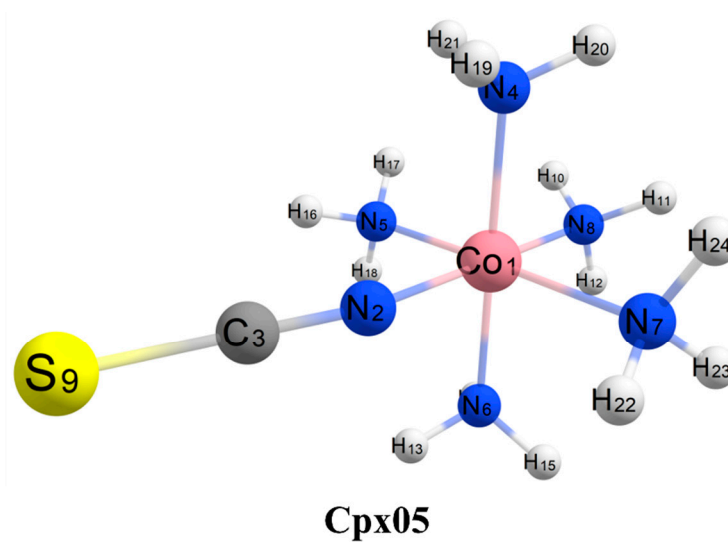

**Figure S2.** 3D structure (with labels) of Co(III) complexes considered in the initial set of the benchmarking. Ref -  $[\text{Co}(\text{CN})_6]^{3-}$ , Cpx01 -  $[\text{Co}(\text{NH}_3)_6]^{3+}$ , Cpx02 -  $[\text{Co}(\text{NH}_3)_5\text{Cl}]^{2+}$ , Cpx03 -  $[\text{Co}(\text{NH}_3)_5(\text{NO}_2)]^{2+}$ , Cpx04 -  $[\text{Co}(\text{NH}_3)_5(\text{SCN})]^{2+}$ , and Cpx05 -  $[\text{Co}(\text{NH}_3)_5(\text{NCS})]^{2+}$ .

**Table S1.** Calculated bond lengths (Å) and bond angles (°) for Ref – [Co(CN)<sub>6</sub>]<sup>3-</sup> at **DFT-Functional**/def2-SVP/def2-SVP/IEF-PCM(UFF) level. The mean relative deviation (MRD) in relation to the experimental X-ray values considering all structural parameters evaluated is also presented.

|                 | DFT-Functional      | Co-C         | C2-Co-C6    | C2-Co-C7     | Co-C2-N3     | MRD   |
|-----------------|---------------------|--------------|-------------|--------------|--------------|-------|
| GGA             | BP86                | 1.902        | 90.0        | 180.0        | 180.0        | 0.35% |
|                 | BLYP                | 1.931        | 90.0        | 180.0        | 179.9        | 0.72% |
|                 | PBE                 | 1.898        | 90.0        | 180.0        | 179.9        | 0.34% |
|                 | PW91                | 1.898        | 90.1        | 180.0        | 179.9        | 0.36% |
| meta-GGA        | M06-L               | 1.923        | 90.0        | 180.0        | 179.9        | 0.61% |
|                 | TPSS                | 1.909        | 90.0        | 180.0        | 180.0        | 0.44% |
|                 | BB95                | 1.901        | 90.0        | 180.0        | 180.0        | 0.34% |
| Hybrid          | B3PW91              | 1.906        | 90.0        | 180.0        | 179.9        | 0.39% |
|                 | B3LYP               | 1.928        | 90.0        | 180.0        | 179.8        | 0.66% |
|                 | PBE0                | 1.913        | 90.0        | 180.0        | 180.0        | 0.49% |
|                 | BHandHLYP           | 1.949        | 90.0        | 180.0        | 179.8        | 0.94% |
| Hybrid meta-GGA | TPSSh               | 1.910        | 90.0        | 180.0        | 179.8        | 0.43% |
|                 | B1B95               | 1.906        | 90.0        | 180.0        | 179.9        | 0.39% |
|                 | BMK                 | 1.951        | 90.0        | 180.0        | 179.9        | 0.98% |
|                 | M06                 | 1.912        | 90.0        | 180.0        | 179.9        | 0.47% |
|                 | M06-2X              | 1.977        | 89.9        | 180.0        | 179.8        | 1.28% |
| LR corrected    | CAM-B3LYP           | 1.918        | 90.0        | 180.0        | 180.0        | 0.56% |
|                 | LC-BLYP             | 1.890        | 90.0        | 180.0        | 180.0        | 0.45% |
|                 | LC-wPBE             | 1.893        | 90.0        | 180.0        | 179.9        | 0.40% |
|                 | B97D3               | 1.914        | 90.0        | 180.0        | 180.0        | 0.51% |
|                 | wB97xD              | 1.921        | 90.0        | 180.0        | 179.9        | 0.59% |
|                 | <b>Experimental</b> | <b>1.900</b> | <b>89.9</b> | <b>180.0</b> | <b>177.9</b> |       |

Experimental X-ray values obtained from <sup>a</sup>Iwata and Saito [56]. MRD = mean relative deviation, eq. (4).

**Table S2.** Calculated bond lengths (Å) and bond angles (°) for Cpx01 – [Co(NH<sub>3</sub>)<sub>6</sub>]<sup>3+</sup> at **DFT-Functional**/def2-SVP/def2-SVP/IEF-PCM(UFF) level. The mean relative deviation (MRD) in relation to the experimental X-ray values considering all structural parameters evaluated is also presented.

|                 | DFT-Functional      | Co-N  | N3-Co-N7 | N4-Co-N2 | Co-N3-H8 | MRD   |
|-----------------|---------------------|-------|----------|----------|----------|-------|
| GGA             | BP86                | 1.986 | 89.9     | 180.0    | 113.5    | 1.54% |
|                 | BLYP                | 2.010 | 90.1     | 180.0    | 114.0    | 2.02% |
|                 | PBE                 | 1.984 | 90.1     | 180.0    | 114.1    | 1.71% |
|                 | PW91                | 1.982 | 90.1     | 180.0    | 114.1    | 1.68% |
| meta-GGA        | M06-L               | 1.998 | 90.0     | 180.0    | 113.8    | 1.79% |
|                 | TPSS                | 1.987 | 90.1     | 180.0    | 113.9    | 1.70% |
|                 | BB95                | 1.989 | 90.1     | 180.0    | 114.1    | 1.77% |
| Hybrid          | B3PW91              | 1.980 | 90.1     | 180.0    | 114.0    | 1.64% |
|                 | B3LYP               | 1.993 | 90.1     | 180.0    | 113.9    | 1.78% |
|                 | PBE0                | 1.972 | 90.1     | 180.0    | 114.0    | 1.53% |
|                 | BHandHLYP           | 1.984 | 90.1     | 180.0    | 114.0    | 1.69% |
| Hybrid meta-GGA | TPSSh               | 1.982 | 90.0     | 180.0    | 113.5    | 1.52% |
|                 | B1B95               | 1.976 | 90.1     | 180.0    | 113.3    | 1.42% |
|                 | BMK                 | 1.995 | 90.0     | 180.0    | 114.1    | 1.82% |
|                 | M06                 | 1.974 | 89.9     | 180.0    | 113.5    | 1.39% |
|                 | M06-2X              | 1.999 | 89.6     | 180.0    | 113.5    | 1.62% |
| LR corrected    | CAM-B3LYP           | 1.974 | 90.0     | 180.0    | 113.9    | 1.51% |
|                 | LC-BLYP             | 1.946 | 89.9     | 180.0    | 113.3    | 1.37% |
|                 | LC-wPBE             | 1.961 | 90.0     | 180.0    | 113.2    | 1.18% |
|                 | B97D3               | 1.992 | 90.0     | 180.0    | 113.4    | 1.62% |
|                 | wB97xD              | 1.984 | 89.5     | 180.0    | 114.2    | 1.56% |
|                 | <b>Experimental</b> | 1.961 | 88.8     | 180.0    | 109.5    |       |

Experimental X-ray values obtained from Kruger and Reynhardt [51]. MRD = mean relative deviation, eq. (4).

**Table S3.** Calculated bond lengths (Å) and bond angles (°) for Cpx02 – [Co(NH<sub>3</sub>)<sub>5</sub>Cl]<sup>2+</sup> at **DFT-Functional**/def2-SVP/def2-SVP/IEF-PCM(UFF) level. The mean relative deviation (MRD) in relation to the experimental X-ray values considering all structural parameters evaluated is also presented.

|                 | DFT-Functional      | Co-N  | Co-Cl | N4-Co-Cl | N2-Co-Cl | N2-Co-N4 | N2-Co-N6 | Co-N4-H9 | MRD   |
|-----------------|---------------------|-------|-------|----------|----------|----------|----------|----------|-------|
| GGA             | BP86                | 1.984 | 2.277 | 88.0     | 179.6    | 91.9     | 92.1     | 106.5    | 1.69% |
|                 | BLYP                | 2.000 | 2.305 | 87.8     | 179.6    | 92.6     | 91.3     | 106.8    | 1.96% |
|                 | PBE                 | 1.975 | 2.273 | 87.7     | 179.7    | 92.5     | 91.6     | 106.4    | 1.67% |
|                 | PW91                | 1.978 | 2.267 | 87.7     | 179.3    | 92.6     | 91.8     | 107.1    | 1.68% |
| meta-GGA        | M06-L               | 1.995 | 2.281 | 88.3     | 179.3    | 91.6     | 91.6     | 107.0    | 1.58% |
|                 | TPSS                | 1.978 | 2.271 | 87.9     | 179.6    | 91.9     | 92.0     | 106.5    | 1.61% |
|                 | BB95                | 1.982 | 2.274 | 88.5     | 179.6    | 91.2     | 92.0     | 108.2    | 1.23% |
| Hybrid          | B3PW91              | 1.972 | 2.257 | 89.0     | 179.4    | 90.5     | 91.7     | 107.0    | 1.14% |
|                 | B3LYP               | 1.988 | 2.274 | 88.8     | 179.4    | 91.0     | 91.6     | 107.2    | 1.27% |
|                 | PBE0                | 1.969 | 2.252 | 88.9     | 179.5    | 91.3     | 91.0     | 107.0    | 1.18% |
|                 | BHandHLYP           | 1.980 | 2.265 | 87.9     | 179.4    | 91.6     | 91.7     | 108.6    | 1.29% |
| Hybrid meta-GGA | TPSSh               | 1.973 | 2.262 | 88.6     | 179.1    | 92.0     | 90.9     | 106.9    | 1.33% |
|                 | B1B95               | 1.966 | 2.252 | 88.1     | 179.6    | 92.1     | 91.4     | 106.7    | 1.51% |
|                 | BMK                 | 1.991 | 2.280 | 88.8     | 179.4    | 91.4     | 91.4     | 106.9    | 1.41% |
|                 | M06                 | 1.967 | 2.253 | 88.8     | 179.7    | 91.4     | 90.7     | 107.3    | 1.09% |
| LR corrected    | M06-2X              | 1.993 | 2.275 | 89.0     | 179.1    | 91.9     | 90.4     | 106.7    | 1.39% |
|                 | CAM-B3LYP           | 1.970 | 2.247 | 88.7     | 179.6    | 91.8     | 91.8     | 106.3    | 1.54% |
|                 | LC-BLYP             | 1.940 | 2.224 | 88.4     | 179.5    | 91.1     | 92.0     | 107.8    | 1.40% |
|                 | LC-wPBE             | 1.956 | 2.235 | 88.6     | 179.4    | 91.6     | 91.5     | 106.7    | 1.41% |
|                 | B97D3               | 1.979 | 2.273 | 88.7     | 179.2    | 90.7     | 92.1     | 107.3    | 1.25% |
|                 | wB97xD              | 1.979 | 2.265 | 88.2     | 179.7    | 92.0     | 92.3     | 106.3    | 1.67% |
|                 | <b>Experimental</b> | 1.951 | 2.270 | 90.3     | 179.7    | 89.4     | 90.6     | 109.5    |       |

Experimental X-ray values obtained from Messmer and Amma [53]. MRD = mean relative deviation, eq. (4).

**Table S4.** Calculated bond lengths (Å) and bond angles (°) for Cpx03 – [Co(NH<sub>3</sub>)<sub>5</sub>(NO<sub>2</sub>)]<sup>2+</sup> at **DFT-Functional**/def2-SVP/def2-SVP/IEF-PCM(UFF) level. The mean relative deviation (MRD) in relation to the experimental X-ray values considering all structural parameters evaluated is also presented.

|                 | <b>DFT-Functional</b> | <b>Co-N</b> | <b>Co-NO2</b> | <b>N3-Co-N4</b> | <b>N3-Co-N8</b> | <b>N3-Co-N5</b> | <b>N2-Co-N5</b> | <b>Co-N5-O6</b> | <b>Co-N3-H21</b> | <b>MRD</b> |
|-----------------|-----------------------|-------------|---------------|-----------------|-----------------|-----------------|-----------------|-----------------|------------------|------------|
| GGA             | BP86                  | 2.031       | 1.914         | 92.2            | 177.0           | 88.7            | 179.3           | 118.7           | 107.6            | 1.27%      |
|                 | BLYP                  | 2.003       | 1.946         | 92.2            | 177.0           | 88.7            | 179.3           | 118.7           | 108.0            | 1.12%      |
|                 | PBE                   | 1.975       | 1.912         | 92.0            | 177.4           | 89.0            | 179.3           | 118.6           | 107.7            | 0.83%      |
|                 | PW91                  | 1.973       | 1.910         | 92.0            | 177.3           | 89.0            | 179.3           | 118.7           | 107.6            | 0.85%      |
| meta-GGA        | M06-L                 | 1.992       | 1.942         | 92.6            | 176.8           | 88.6            | 179.2           | 118.4           | 108.9            | 1.04%      |
|                 | TPSS                  | 1.977       | 1.916         | 92.1            | 177.1           | 88.8            | 179.2           | 118.8           | 107.7            | 0.86%      |
|                 | BB95                  | 1.975       | 1.916         | 92.1            | 177.4           | 89.0            | 179.2           | 118.6           | 107.7            | 0.82%      |
| Hybrid          | B3PW91                | 1.971       | 1.934         | 92.3            | 176.0           | 88.2            | 179.4           | 118.8           | 107.9            | 1.02%      |
|                 | B3LYP                 | 1.986       | 1.952         | 92.4            | 176.1           | 88.2            | 179.3           | 118.8           | 108.0            | 1.20%      |
|                 | PBE0                  | 1.963       | 1.930         | 92.4            | 176.0           | 88.1            | 179.4           | 118.8           | 107.9            | 1.08%      |
|                 | BHandHLYP             | 1.973       | 1.956         | 92.3            | 175.6           | 88.0            | 179.6           | 119.0           | 108.4            | 1.12%      |
| Hybrid meta-GGA | TPSSh                 | 1.972       | 1.925         | 92.1            | 176.8           | 88.7            | 179.2           | 118.8           | 107.9            | 0.82%      |
|                 | B1B95                 | 1.963       | 1.931         | 92.4            | 176.3           | 88.5            | 179.2           | 118.7           | 107.9            | 1.03%      |
|                 | BMK                   | 1.989       | 1.973         | 92.6            | 175.1           | 87.8            | 179.2           | 119.0           | 107.9            | 1.51%      |
|                 | M06                   | 1.967       | 1.939         | 91.9            | 176.9           | 88.5            | 179.2           | 118.7           | 108.5            | 0.88%      |
| LR corrected    | M06-2X                | 1.992       | 1.970         | 92.7            | 175.1           | 87.8            | 179.2           | 118.8           | 107.9            | 1.54%      |
|                 | CAM-B3LYP             | 1.966       | 1.934         | 92.5            | 175.8           | 88.1            | 179.4           | 119.0           | 107.7            | 1.11%      |
|                 | LC-BLYP               | 1.936       | 1.907         | 92.8            | 175.8           | 87.9            | 179.4           | 119.0           | 107.2            | 1.47%      |
|                 | LC-wPBE               | 2.008       | 2.011         | 92.3            | 175.0           | 87.7            | 179.1           | 119.2           | 108.9            | 1.72%      |
|                 | B97D3                 | 1.986       | 1.930         | 91.4            | 177.4           | 88.7            | 179.1           | 118.5           | 108.6            | 0.87%      |
|                 | wB97xD                | 1.976       | 1.943         | 91.7            | 176.5           | 88.3            | 179.0           | 119.0           | 108.4            | 0.95%      |
|                 | <b>Experimental</b>   | 1.974       | 1.924         | 91.9            | 179.9           | 90.0            | 180.0           | 120.2           | 109.5            |            |

Experimental X-ray values obtained from Cotton and Edwards [54]. MRD = mean relative deviation, eq. (4).

**Table S5.** Calculated bond lengths (Å) and bond angles (°) for Cpx04 – [Co(NH<sub>3</sub>)<sub>5</sub>(SCN)]<sup>2+</sup> at **DFT-Functional**/def2-SVP/def2-SVP/IEF-PCM(UFF) level. The mean relative deviation (MRD) in relation to the experimental X-ray values considering all structural parameters evaluated is also presented.

|                 | <b>DFT-Functional</b> | <b>Co-N</b> | <b>Co-SCN</b> | <b>N3-Co-N4</b> | <b>N4-Co-N8</b> | <b>N4-Co-S</b> | <b>N7-Co-S</b> | <b>Co-S-C</b> | <b>MRD</b> |
|-----------------|-----------------------|-------------|---------------|-----------------|-----------------|----------------|----------------|---------------|------------|
| GGA             | BP86                  | 2.009       | 2.338         | 89.5            | 178.3           | 90.0           | 175.2          | 104.7         | 1.50%      |
|                 | BLYP                  | 2.007       | 2.382         | 89.6            | 178.8           | 90.5           | 175.4          | 105.2         | 1.71%      |
|                 | PBE                   | 1.980       | 2.328         | 90.5            | 177.7           | 89.6           | 175.9          | 103.0         | 1.35%      |
|                 | PW91                  | 1.980       | 2.325         | 89.8            | 177.0           | 89.5           | 175.7          | 102.0         | 1.67%      |
| meta-GGA        | M06-L                 | 1.998       | 2.360         | 88.9            | 177.5           | 90.2           | 175.7          | 99.9          | 2.30%      |
|                 | TPSS                  | 1.983       | 2.382         | 90.4            | 177.6           | 90.0           | 175.7          | 103.6         | 1.61%      |
|                 | BB95                  | 1.984       | 2.333         | 88.4            | 177.1           | 90.8           | 175.0          | 101.4         | 1.89%      |
| Hybrid          | B3PW91                | 1.975       | 2.335         | 90.4            | 178.4           | 90.6           | 175.7          | 104.0         | 1.06%      |
|                 | B3LYP                 | 1.990       | 2.362         | 89.6            | 179.4           | 90.9           | 175.2          | 104.0         | 1.54%      |
|                 | PBE0                  | 1.968       | 2.328         | 90.2            | 178.5           | 90.7           | 175.8          | 103.2         | 1.09%      |
|                 | BHandHLYP             | 1.981       | 2.354         | 90.1            | 178.3           | 90.6           | 175.8          | 102.7         | 1.43%      |
| Hybrid meta-GGA | TPSSh                 | 1.977       | 2.334         | 90.4            | 178.3           | 90.5           | 175.8          | 103.8         | 1.09%      |
|                 | B1B95                 | 1.971       | 2.324         | 88.9            | 177.1           | 90.1           | 175.5          | 100.5         | 1.85%      |
|                 | BMK                   | 1.996       | 2.364         | 89.0            | 176.9           | 90.1           | 175.5          | 100.7         | 2.26%      |
|                 | M06                   | 1.972       | 2.333         | 89.5            | 177.1           | 89.7           | 175.4          | 100.6         | 1.88%      |
|                 | M06-2X                | 2.000       | 2.374         | 88.9            | 177.1           | 90.0           | 175.7          | 99.1          | 2.57%      |
| LR corrected    | CAM-B3LYP             | 1.974       | 2.324         | 89.7            | 177.3           | 89.7           | 175.6          | 101.7         | 1.62%      |
|                 | LC-BLYP               | 1.946       | 2.284         | 89.0            | 177.9           | 90.8           | 175.4          | 101.0         | 1.17%      |
|                 | LC-wPBE               | 1.961       | 2.287         | 89.4            | 177.6           | 90.4           | 175.6          | 101.9         | 1.18%      |
|                 | B97D3                 | 1.991       | 2.355         | 89.0            | 177.3           | 90.3           | 175.3          | 101.3         | 2.04%      |
|                 | wB97xD                | 1.985       | 2.332         | 89.2            | 177.5           | 90.5           | 175.2          | 101.1         | 1.81%      |
|                 | <b>Experimental</b>   | 1.932       | 2.272         | 90.6            | 178.3           | 91.6           | 176.0          | 104.9         |            |

Experimental X-ray values obtained from Snow and Boomsma [55]. MRD = mean relative deviation, eq. (4).



**Table S6.** Calculated bond lengths (Å) and bond angles (°) for Cpx05 – [Co(NH<sub>3</sub>)<sub>5</sub>(NCS)]<sup>2+</sup> at **DFT-Functional**/def2-SVP/def2-SVP/IEF-PCM(UFF) level. The mean relative deviation (MRD) in relation to the experimental X-ray values considering all structural parameters evaluated is also presented.

|                 | <b>DFT-Functional</b> | <b>Co-N</b> | <b>Co-NCS</b> | <b>N4-Co-N7</b> | <b>N4-Co-N6</b> | <b>N4-Co-NCS</b> | <b>N8-Co-NCS</b> | <b>Co-N2-C</b> | <b>MRD</b> |
|-----------------|-----------------------|-------------|---------------|-----------------|-----------------|------------------|------------------|----------------|------------|
| GGA             | BP86                  | 1.985       | 1.889         | 90.0            | 177.3           | 88.8             | 179.4            | 159.4          | 2.79%      |
|                 | BLYP                  | 2.004       | 1.917         | 89.4            | 178.1           | 89.4             | 179.6            | 158.5          | 2.72%      |
|                 | PBE                   | 1.978       | 1.889         | 89.9            | 177.4           | 88.7             | 179.0            | 157.7          | 2.93%      |
|                 | PW91                  | 1.973       | 1.889         | 90.0            | 177.4           | 88.9             | 179.3            | 155.3          | 3.01%      |
| meta-GGA        | M06-L                 | 1.990       | 1.912         | 89.8            | 177.7           | 89.0             | 179.8            | 152.8          | 3.12%      |
|                 | TPSS                  | 1.976       | 1.891         | 89.9            | 177.1           | 89.0             | 179.8            | 161.7          | 2.49%      |
|                 | BB95                  | 1.978       | 1.894         | 90.5            | 177.2           | 89.4             | 179.1            | 158.0          | 2.83%      |
| Hybrid          | B3PW91                | 1.974       | 1.888         | 90.0            | 177.4           | 88.7             | 179.5            | 178.7          | 1.18%      |
|                 | B3LYP                 | 1.986       | 1.902         | 89.7            | 177.6           | 88.9             | 179.4            | 176.9          | 1.32%      |
|                 | PBE0                  | 1.964       | 1.887         | 90.0            | 177.7           | 88.5             | 179.4            | 177.9          | 1.20%      |
|                 | BHandHLYP             | 1.975       | 1.908         | 90.2            | 177.7           | 88.9             | 179.1            | 179.8          | 0.97%      |
| Hybrid meta-GGA | TPSSh                 | 1.972       | 1.885         | 90.0            | 177.4           | 88.8             | 179.6            | 176.3          | 1.36%      |
|                 | B1B95                 | 1.964       | 1.889         | 89.8            | 177.3           | 88.6             | 179.4            | 177.7          | 1.25%      |
|                 | BMK                   | 1.992       | 1.914         | 90.2            | 177.9           | 89.9             | 179.0            | 172.5          | 1.46%      |
|                 | M06                   | 1.965       | 1.889         | 90.7            | 177.7           | 89.6             | 179.4            | 167.5          | 1.95%      |
| LR corrected    | M06-2X                | 1.991       | 1.923         | 90.1            | 177.5           | 88.6             | 179.4            | 179.3          | 1.04%      |
|                 | CAM-B3LYP             | 1.967       | 1.894         | 90.3            | 177.4           | 88.6             | 179.4            | 178.3          | 1.19%      |
|                 | LC-BLYP               | 1.939       | 1.873         | 90.3            | 177.4           | 88.9             | 179.5            | 178.8          | 1.07%      |
|                 | LC-wPBE               | 1.954       | 1.883         | 90.1            | 177.4           | 88.6             | 179.2            | 179.2          | 1.09%      |
|                 | B97D3                 | 1.988       | 1.904         | 89.8            | 178.1           | 88.2             | 178.1            | 148.0          | 3.77%      |
|                 | wB97xD                | 1.973       | 1.895         | 90.1            | 177.9           | 89.2             | 179.0            | 178.8          | 1.05%      |
|                 | <b>Experimental</b>   | 1.941       | 1.941         | 90.0            | 180.0           | 90.0             | 180.0            | 180.0          |            |

Experimental X-ray values obtained from Snow and Boomsma [55]. MRD = mean relative deviation, eq. (4).

# NMR-DKH basis set for the Co atom (GAUSSIAN PROGRAM FORMAT)

Co 0  
S 7 1.00  
201875.076137984 0.00178  
80750.0304551935 0.00016  
32300.0121820774 0.00459  
12920.0048728310 0.00714  
5168.00194913238 0.02159  
2067.20077965295 0.05491  
826.880311861181 0.14306  
S 1 1.00  
330.752124744472 1.00000  
S 1 1.00  
132.300849897789 1.00000  
S 1 1.00  
52.9203399591156 1.00000  
S 1 1.00  
21.1681359836462 1.00000  
S 1 1.00  
8.46725439345849 1.00000  
S 1 1.00  
3.38690175738340 1.00000  
S 1 1.00  
1.35476070295336 1.00000  
S 1 1.00  
0.54190428118134 1.00000  
S 1 1.00  
0.21676171247254 1.00000  
S 1 1.00  
0.08670468498902 1.00000  
S 1 1.00  
0.03468187399561 1.00000  
P 6 1.00  
2288.26618462583 0.00188  
832.096794409393 0.00573  
302.580652512507 0.03133  
110.029328186366 0.12729  
40.0106647950422 0.38078  
14.5493326527426 0.50546  
P 1 1.00  
5.29066641917913 1.00000  
P 1 1.00  
1.92387869788332 1.00000  
P 1 1.00  
0.69959225377575 1.00000  
P 1 1.00  
0.25439718319118 1.00000  
P 1 1.00  
0.09250806661498 1.00000  
D 4 1.00  
51.2453777725453 0.00236  
17.0817925908484 0.01188  
5.69393086361615 0.04049  
1.89797695453872 0.06238  
D 1 1.00  
0.63265898484624 1.00000  
D 1 1.00  
0.21088632828208 1.00000  
F 2 1.00  
8.78000000000000 0.03333  
2.40990000000000 0.89086  
F 1 1.00  
0.76180000000000 1.00000

\*\*\*\*

# Model 1: Optimized structures at BLYP/def2-SVP/def2-SVP/IEF-PCM(UFF) level

Cpx01:  $[\text{Co}(\text{NH}_3)_6]^{3+}$

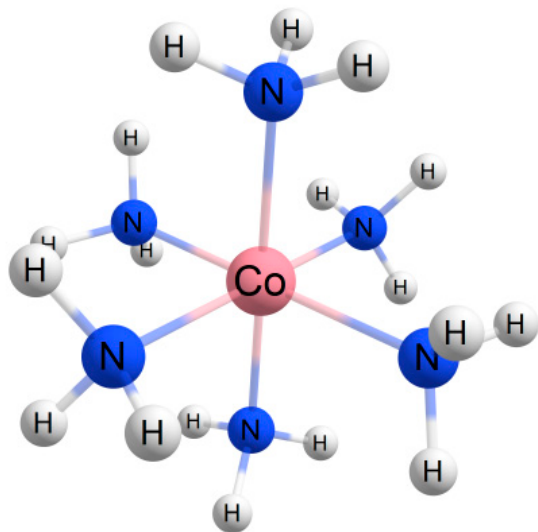

25

|    |           |           |           |
|----|-----------|-----------|-----------|
| Co | 0.000000  | 0.000000  | 0.000000  |
| N  | -0.142158 | -0.030008 | 2.004169  |
| N  | 1.396605  | 1.441557  | 0.114420  |
| N  | 0.142158  | 0.030008  | -2.004169 |
| N  | -1.436080 | 1.404098  | -0.102069 |
| N  | -1.396605 | -1.441557 | -0.114420 |
| N  | 1.436080  | -1.404098 | 0.102069  |
| H  | 2.116671  | 1.388762  | -0.625234 |
| H  | 1.005914  | 2.395775  | 0.036598  |
| H  | 1.925723  | 1.444932  | 1.002649  |
| H  | 0.736364  | 0.217532  | 2.489311  |
| H  | -0.844128 | 0.630915  | 2.376419  |
| H  | -0.412151 | -0.949000 | 2.392904  |
| H  | 2.392599  | -1.017185 | 0.037055  |
| H  | 1.424208  | -1.935845 | 0.988102  |
| H  | 1.389762  | -2.122911 | -0.639978 |
| H  | 0.844128  | -0.630915 | -2.376419 |
| H  | -0.736364 | -0.217532 | -2.489311 |
| H  | 0.412151  | 0.949000  | -2.392904 |
| H  | -1.005914 | -2.395775 | -0.036598 |
| H  | -2.116671 | -1.388762 | 0.625234  |
| H  | -1.925723 | -1.444932 | -1.002649 |
| H  | -1.424208 | 1.935845  | -0.988102 |
| H  | -2.392599 | 1.017185  | -0.037055 |
| H  | -1.389762 | 2.122911  | 0.639978  |

Cpx02:  $[\text{Co}(\text{NH}_3)_5\text{Cl}]^{2+}$

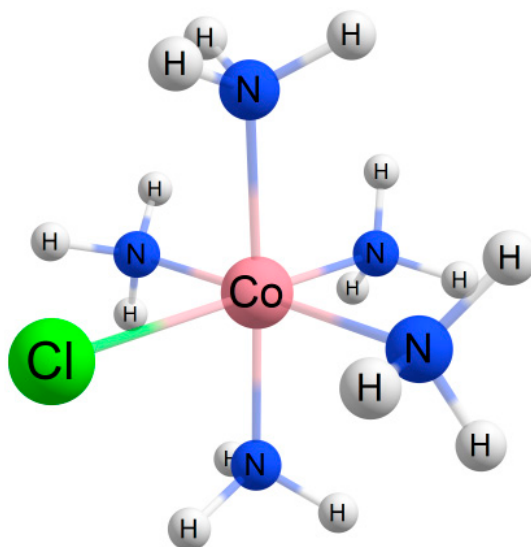

22

|    |           |           |           |
|----|-----------|-----------|-----------|
| Co | 0.225589  | 0.001049  | -0.002071 |
| N  | 2.237893  | 0.016642  | -0.016040 |
| N  | 0.136750  | 1.816863  | 0.832429  |
| N  | 0.114990  | 0.858054  | -1.808381 |
| Cl | -2.079218 | -0.031554 | 0.024121  |
| N  | 0.197951  | -0.833401 | 1.813842  |
| N  | 0.177050  | -1.808986 | -0.858002 |
| H  | 0.364403  | 0.244547  | -2.600136 |
| H  | -0.874679 | 1.119503  | -1.954298 |
| H  | 0.674474  | 1.717301  | -1.936008 |
| H  | 0.335897  | -2.595579 | -0.208128 |
| H  | -0.776654 | -1.948425 | -1.231767 |
| H  | 0.837741  | -1.962836 | -1.637503 |
| H  | 0.665388  | -0.294030 | 2.559849  |
| H  | -0.796910 | -0.911903 | 2.085015  |
| H  | 0.594063  | -1.784603 | 1.878102  |
| H  | 0.479569  | 1.878008  | 1.804859  |
| H  | 0.622402  | 2.571817  | 0.321238  |
| H  | -0.864877 | 2.073577  | 0.863822  |
| H  | 2.653627  | -0.860108 | 0.338276  |
| H  | 2.646252  | 0.152447  | -0.954869 |
| H  | 2.642656  | 0.764161  | 0.570470  |

Cpx03:  $[\text{Co}(\text{NH}_3)_5(\text{NO}_2)]^{2+}$ 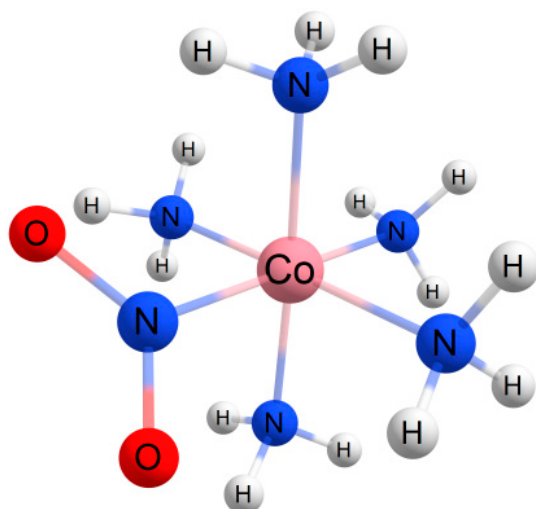

24

|    |           |           |           |
|----|-----------|-----------|-----------|
| Co | -0.346508 | 0.000149  | -0.002612 |
| N  | -2.403053 | 0.008276  | 0.003527  |
| N  | -0.308061 | -1.409778 | 1.419930  |
| N  | -0.322651 | 1.475481  | 1.352727  |
| N  | 1.599580  | 0.003428  | 0.012521  |
| O  | 2.198946  | -1.087371 | 0.011158  |
| O  | 2.193427  | 1.097293  | 0.021225  |
| N  | -0.283598 | 1.391334  | -1.442213 |
| N  | -0.299237 | -1.473413 | -1.360925 |
| H  | 0.617552  | 1.895149  | -1.364157 |
| H  | -0.322283 | 1.022087  | -2.405763 |
| H  | -1.025456 | 2.107644  | -1.398641 |
| H  | -0.388445 | 1.165740  | 2.335418  |
| H  | -1.067215 | 2.182656  | 1.243336  |
| H  | 0.580356  | 1.975561  | 1.267957  |
| H  | -2.804382 | -0.162451 | 0.939865  |
| H  | -2.823476 | 0.897722  | -0.309836 |
| H  | -2.820467 | -0.710316 | -0.609557 |
| H  | -0.315315 | -1.059526 | 2.391480  |
| H  | -1.079114 | -2.095392 | 1.370705  |
| H  | 0.573281  | -1.943494 | 1.316662  |
| H  | -0.925295 | -2.268985 | -1.157069 |
| H  | -0.523656 | -1.193466 | -2.329111 |
| H  | 0.659775  | -1.863636 | -1.378798 |

Cpx04:  $[\text{Co}(\text{NH}_3)_5(\text{SCN})]^{2+}$ 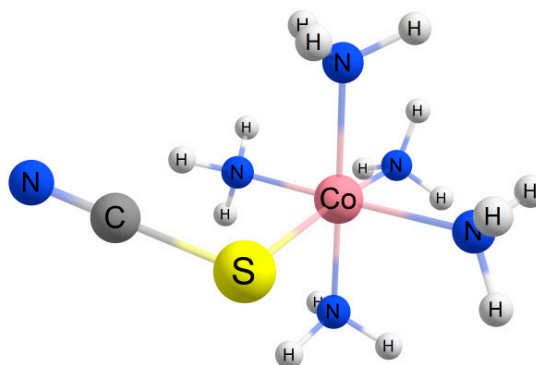

24

|    |           |           |           |
|----|-----------|-----------|-----------|
| Co | -0.590081 | 0.053986  | -0.001070 |
| S  | 1.443860  | -1.183705 | 0.084850  |
| N  | 0.289866  | 1.790465  | 0.469287  |
| N  | -0.291337 | 0.445322  | -1.946555 |
| C  | 2.668593  | -0.026303 | 0.007598  |
| N  | 3.520112  | 0.795891  | -0.041633 |
| N  | -2.406465 | 0.972513  | -0.036020 |
| N  | -0.849175 | -0.351807 | 1.947229  |
| N  | -1.431666 | -1.696918 | -0.535228 |
| H  | -2.444351 | 1.849173  | 0.509144  |
| H  | -3.167766 | 0.388705  | 0.348016  |
| H  | -2.713771 | 1.235955  | -0.986751 |
| H  | -2.335218 | -1.598341 | -1.027967 |
| H  | -1.628255 | -2.332736 | 0.255062  |
| H  | -0.830282 | -2.243747 | -1.174088 |
| H  | -1.169657 | 0.449019  | 2.516287  |
| H  | -1.529434 | -1.103785 | 2.145171  |
| H  | 0.042268  | -0.667144 | 2.365391  |
| H  | -0.132577 | 2.609669  | 0.002127  |
| H  | 0.264991  | 2.013255  | 1.477862  |
| H  | 1.295481  | 1.810975  | 0.218666  |
| H  | -0.132465 | 1.442391  | -2.166062 |
| H  | 0.545843  | -0.053049 | -2.292150 |
| H  | -1.065283 | 0.150885  | -2.564575 |

Cpx05:  $[\text{Co}(\text{NH}_3)_5(\text{NCS})]^{2+}$ 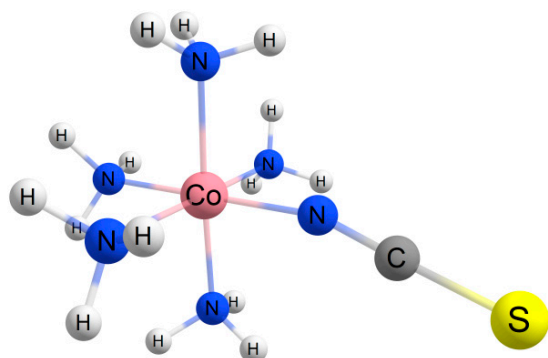

24

|    |          |          |          |
|----|----------|----------|----------|
| Co | 0.82252  | 0.00181  | 0.00391  |
| N  | -1.05366 | -0.10998 | -0.37284 |
| C  | -2.23976 | -0.04853 | -0.18138 |
| N  | 0.86106  | -1.98046 | 0.29797  |
| N  | 0.39037  | 0.30944  | 1.93083  |
| N  | 0.74431  | 1.97557  | -0.34063 |
| N  | 1.15721  | -0.30302 | -1.95659 |
| N  | 2.78968  | 0.10418  | 0.39589  |
| S  | -3.85135 | -0.00683 | 0.01261  |
| H  | 3.04317  | -0.19760 | 1.35115  |
| H  | 3.36953  | -0.47511 | -0.23219 |
| H  | 3.17061  | 1.05941  | 0.30592  |
| H  | -0.23980 | 2.28235  | -0.28411 |
| H  | 1.27658  | 2.57450  | 0.31158  |
| H  | 1.06493  | 2.24550  | -1.28432 |
| H  | -0.59329 | 0.04851  | 2.10683  |
| H  | 0.96049  | -0.22739 | 2.60430  |
| H  | 0.47545  | 1.29571  | 2.22406  |
| H  | 0.04949  | -2.40331 | -0.18006 |
| H  | 1.70272  | -2.46040 | -0.05912 |
| H  | 0.78280  | -2.26636 | 1.28734  |
| H  | 0.29288  | -0.05279 | -2.46426 |
| H  | 1.92517  | 0.24428  | -2.37779 |
| H  | 1.34867  | -1.28588 | -2.21068 |

Cpx06:  $[\text{Co}(\text{NH}_3)_5(\text{N}_3)]^{2+}$ 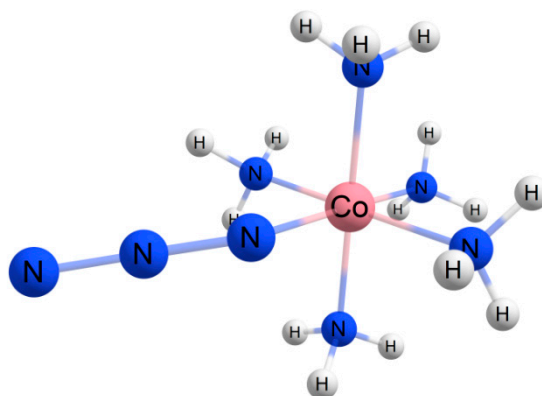

24

|    |          |          |          |
|----|----------|----------|----------|
| Co | -0.42014 | -0.01221 | -0.00147 |
| N  | 0.36872  | -1.79500 | -0.47720 |
| N  | -0.60285 | -0.59632 | 1.90940  |
| N  | -0.17515 | 0.68368  | -1.86612 |
| N  | -1.15294 | 1.78430  | 0.52817  |
| N  | -2.27940 | -0.68739 | -0.48739 |
| N  | 1.32340  | 0.73870  | 0.51157  |
| N  | 2.40767  | 0.28820  | 0.17503  |
| N  | 3.48776  | -0.07139 | -0.09332 |
| H  | -1.89307 | 1.76937  | 1.24945  |
| H  | -1.53048 | 2.36025  | -0.24183 |
| H  | -1.04157 | 1.02242  | -2.31581 |
| H  | 0.23264  | 0.01500  | -2.53951 |
| H  | -2.97938 | 0.06504  | -0.58819 |
| H  | -2.68973 | -1.34045 | 0.19956  |
| H  | -1.56492 | -0.67868 | 2.27727  |
| H  | -0.11224 | 0.08844  | 2.50748  |
| H  | -0.28035 | -2.59004 | -0.34805 |
| H  | 1.19772  | -2.02274 | 0.09594  |
| H  | 0.69453  | -1.87527 | -1.45422 |
| H  | -0.14851 | -1.50171 | 2.11014  |
| H  | -2.29923 | -1.19596 | -1.38603 |
| H  | 0.47680  | 1.48463  | -1.84945 |
| H  | -0.35877 | 2.31599  | 0.92195  |

Cpx07:  $[\text{Co}(\text{NH}_3)_5(\text{HIm})]^{3+} - \text{HIm} = \text{imidazole}$

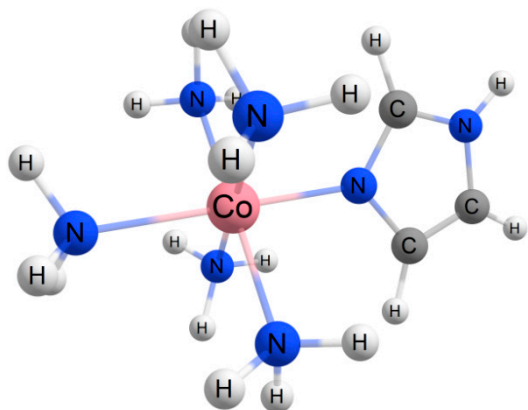

Cpx08:  $[\text{Co}(\text{NH}_3)_5(\text{MeIm})]^{3+} - \text{MeIm} = \text{methylimidazole}$

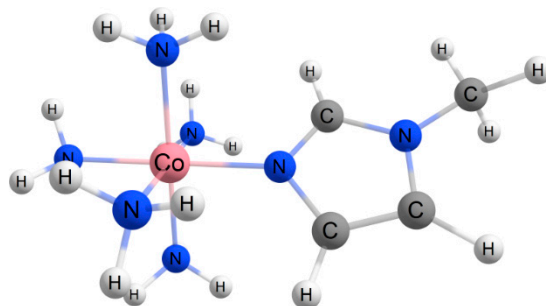

33

30

|    |           |           |           |
|----|-----------|-----------|-----------|
| Co | 0.835421  | -0.001024 | 0.000377  |
| N  | 2.853050  | -0.014785 | -0.012086 |
| N  | 0.843055  | 1.586256  | 1.232479  |
| N  | 0.831427  | -1.572484 | -1.251780 |
| N  | -1.148477 | 0.007982  | 0.009778  |
| C  | -1.955966 | -1.072902 | 0.038801  |
| C  | -1.982476 | 1.129689  | -0.027781 |
| C  | -3.297261 | 0.704936  | -0.019764 |
| N  | -3.250100 | -0.674949 | 0.022710  |
| H  | -1.658070 | -2.124142 | 0.069783  |
| H  | -1.614470 | 2.158037  | -0.056859 |
| H  | -4.236427 | 1.262913  | -0.039859 |
| H  | -4.055983 | -1.308077 | 0.039382  |
| H  | 1.682083  | 1.653902  | 1.832135  |
| H  | 0.040464  | 1.572686  | 1.883451  |
| H  | 3.284897  | 0.240981  | 0.891378  |
| H  | 3.266484  | 0.640806  | -0.696690 |
| H  | 1.658547  | -1.607567 | -1.871141 |
| H  | 0.016845  | -1.555472 | -1.887422 |
| N  | 0.854852  | -1.176201 | 1.630598  |
| H  | 1.423390  | -0.791361 | 2.402759  |
| H  | 1.222026  | -2.131807 | 1.486405  |
| N  | 0.820937  | 1.187492  | -1.617054 |
| H  | 1.239655  | 2.121284  | -1.472689 |
| H  | -0.140354 | 1.360770  | -1.956196 |
| H  | -0.090552 | -1.297824 | 2.031100  |
| H  | 3.258296  | -0.937692 | -0.242600 |
| H  | 1.324269  | 0.796145  | -2.430270 |
| H  | 0.807959  | -2.501911 | -0.800374 |
| H  | 0.795578  | 2.502449  | 0.757494  |

|    |           |           |           |
|----|-----------|-----------|-----------|
| H  | 2.112330  | 1.917525  | -1.428908 |
| H  | 0.480566  | 1.816925  | -1.644940 |
| N  | 1.332657  | 1.245066  | -1.523204 |
| H  | 1.685203  | 2.330614  | 0.920456  |
| H  | -3.685555 | 1.932481  | -0.018817 |
| C  | -2.840412 | 1.239225  | -0.011989 |
| H  | 1.475429  | 0.797698  | -2.443401 |
| H  | -0.967717 | 2.436344  | -0.007710 |
| C  | -1.478644 | 1.470099  | -0.008568 |
| N  | -3.009577 | -0.135634 | -0.002133 |
| N  | 1.373706  | 1.434596  | 1.330666  |
| H  | 2.063555  | 1.232124  | 2.072944  |
| C  | -4.299532 | -0.848791 | -0.001986 |
| N  | -0.817271 | 0.241153  | 0.000784  |
| C  | -1.778641 | -0.708504 | 0.005119  |
| Co | 1.143917  | -0.054366 | 0.000994  |
| H  | 0.493553  | 1.647436  | 1.829106  |
| H  | 3.551964  | -0.369918 | -0.963048 |
| H  | -1.634743 | -1.792153 | 0.015305  |
| H  | 3.677409  | 0.335284  | 0.509099  |
| N  | 3.135648  | -0.370292 | -0.016946 |
| H  | 0.078054  | -1.446306 | -1.895578 |
| N  | 0.939839  | -1.540508 | -1.332833 |
| H  | 1.712345  | -1.590707 | -2.017772 |
| N  | 0.947198  | -1.320981 | 1.551968  |
| H  | 3.410751  | -1.279429 | 0.391290  |
| H  | 0.018519  | -1.227720 | 1.996200  |
| H  | 0.903973  | -2.487563 | -0.921169 |
| H  | 1.627012  | -1.164696 | 2.314849  |
| H  | 1.040435  | -2.323516 | 1.316384  |
| H  | -4.861457 | -0.599022 | -0.920764 |
| H  | -4.887549 | -0.548215 | 0.884467  |
| H  | -4.111844 | -1.935289 | 0.031603  |

Cpx09:  $[\text{CoBr}(\text{NH}_3)_6]^{2+}$ 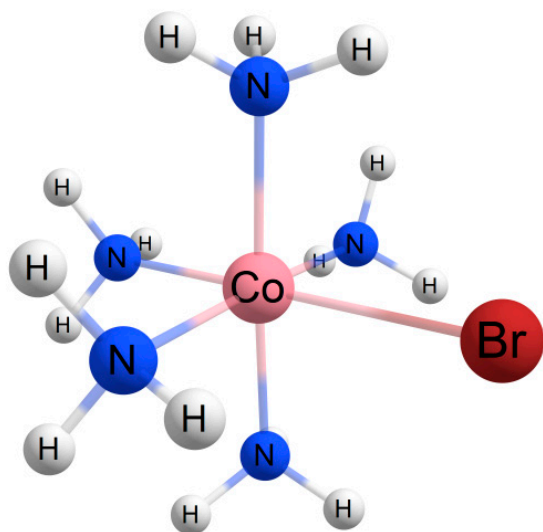

22

|    |           |           |           |
|----|-----------|-----------|-----------|
| Co | 0.600800  | -0.000133 | 0.004603  |
| N  | 0.521146  | -1.800935 | 0.885431  |
| N  | 2.622719  | 0.009738  | 0.001994  |
| N  | 0.560929  | 1.784333  | -0.908426 |
| N  | 0.559433  | 0.885538  | 1.801830  |
| N  | 0.564625  | -0.914644 | -1.773706 |
| H  | 3.027490  | 0.191207  | -0.930651 |
| H  | 3.031299  | 0.730731  | 0.618281  |
| H  | 3.045583  | -0.880625 | 0.311378  |
| H  | 1.300226  | -2.447257 | 0.676318  |
| H  | 0.468207  | -1.760341 | 1.916071  |
| H  | -0.345795 | -2.280368 | 0.592433  |
| H  | 1.027224  | -1.837636 | -1.789846 |
| H  | -0.420302 | -1.076042 | -2.043392 |
| H  | 0.989362  | -0.383652 | -2.551107 |
| H  | 1.068474  | 1.842576  | -1.806331 |
| H  | -0.426501 | 2.008669  | -1.117910 |
| H  | 0.918665  | 2.574183  | -0.347211 |
| H  | 0.866109  | 1.871954  | 1.819003  |
| H  | -0.417097 | 0.892351  | 2.141388  |
| H  | 1.121080  | 0.414918  | 2.530472  |
| Br | -1.865074 | 0.011278  | -0.005516 |

Cpx10:  $[\text{Co}(\text{NH}_3)_5\text{I}]^{2+}$ 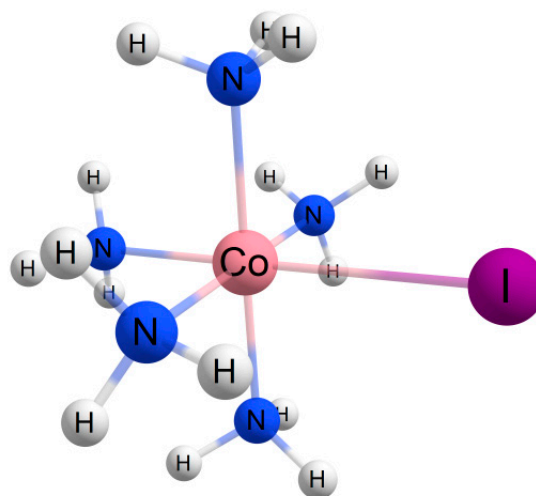

22

|    |           |           |           |
|----|-----------|-----------|-----------|
| Co | 0.943971  | -0.000072 | -0.004005 |
| N  | 0.918882  | -1.220436 | 1.587089  |
| N  | 2.977483  | -0.027237 | -0.027767 |
| N  | 0.911345  | 1.268132  | -1.556892 |
| N  | 0.931119  | 1.577577  | 1.237773  |
| N  | 0.898787  | -1.592564 | -1.228781 |
| H  | 3.380164  | 0.111889  | -0.969157 |
| H  | 3.404164  | 0.708698  | 0.558689  |
| H  | 3.384895  | -0.913234 | 0.312716  |
| H  | 1.716521  | -1.097699 | 2.233253  |
| H  | 0.064197  | -1.077357 | 2.149909  |
| H  | 0.916675  | -2.224738 | 1.346003  |
| H  | 1.732326  | -2.201918 | -1.176324 |
| H  | 0.083851  | -2.195867 | -1.030055 |
| H  | 0.807027  | -1.351518 | -2.228827 |
| H  | 1.005750  | 0.814175  | -2.479850 |
| H  | 0.008139  | 1.768813  | -1.594577 |
| H  | 1.645458  | 1.995793  | -1.540068 |
| H  | 1.425131  | 2.413399  | 0.884965  |
| H  | -0.042681 | 1.878143  | 1.412556  |
| H  | 1.338824  | 1.395079  | 2.169675  |
| I  | -1.751339 | -0.001132 | -0.000391 |

Cpx11:  $\text{trans-}[\text{Co}(\text{en})_2(\text{N}_3)_2]^+$  – en = ethylenediamine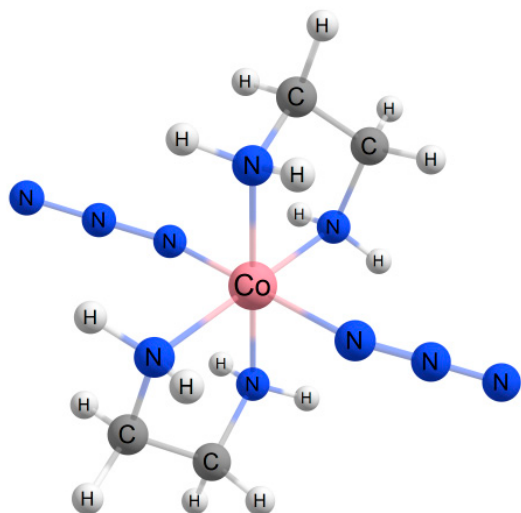

31

|    |           |           |           |
|----|-----------|-----------|-----------|
| Co | 0.000012  | -0.000053 | -0.000027 |
| N  | 1.091041  | 1.148262  | -1.229455 |
| H  | 1.880468  | 0.674273  | -1.694849 |
| H  | 0.437080  | 1.434936  | -1.975776 |
| N  | 0.037506  | 1.575783  | 1.236890  |
| H  | -0.845581 | 1.768860  | 1.733388  |
| H  | 0.733681  | 1.333358  | 1.961052  |
| N  | -1.091146 | -1.148389 | 1.229304  |
| H  | -0.437265 | -1.435246 | 1.975629  |
| H  | -1.880566 | -0.674355 | 1.694678  |
| N  | -0.037523 | -1.575922 | -1.237003 |
| H  | -0.733764 | -1.333414 | -1.961077 |
| H  | 0.845477  | -1.769066 | -1.733628 |
| C  | 1.584668  | 2.352147  | -0.483376 |
| H  | 1.860903  | 3.169069  | -1.178807 |
| H  | 2.493992  | 2.057890  | 0.074200  |
| C  | 0.477967  | 2.788690  | 0.475201  |
| H  | 0.828548  | 3.587506  | 1.158474  |
| H  | -0.395483 | 3.171344  | -0.085425 |
| C  | -1.584855 | -2.352151 | 0.483109  |
| H  | -2.494037 | -2.057704 | -0.074592 |
| H  | -1.861342 | -3.169057 | 1.178453  |
| C  | -0.478053 | -2.788777 | -0.475311 |
| H  | 0.395319  | -3.171394 | 0.085469  |
| H  | -0.828539 | -3.587662 | -1.158556 |
| N  | 1.600257  | -0.688498 | 0.960388  |
| N  | -1.600366 | 0.688200  | -0.960434 |
| N  | 2.670945  | -0.898652 | 0.416527  |
| N  | -2.670690 | 0.899218  | -0.416187 |
| N  | 3.726050  | -1.117768 | -0.043958 |
| N  | -3.725728 | 1.118144  | 0.044549  |

Cpx12:  $\text{trans-}[\text{Co}(\text{en})_2\text{Cl}_2]^+$  – en = ethylenediamine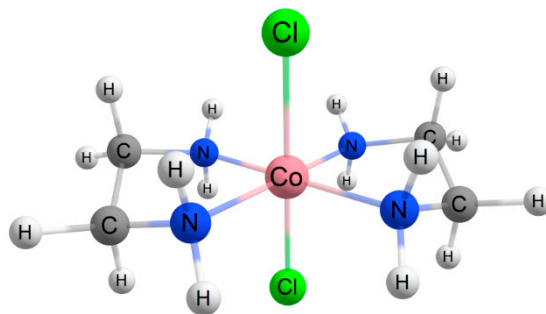

27

|    |           |           |           |
|----|-----------|-----------|-----------|
| Co | 0.000000  | -0.000029 | -0.000020 |
| N  | -1.465704 | 0.085932  | -1.354248 |
| H  | -1.293715 | 0.785458  | -2.091540 |
| H  | -1.503924 | -0.841263 | -1.808642 |
| N  | -1.465976 | -0.081443 | 1.354324  |
| H  | -1.294771 | -0.777476 | 2.095092  |
| H  | -1.504387 | 0.847742  | 1.804708  |
| N  | 1.465713  | -0.086652 | 1.354202  |
| H  | 1.503601  | 0.839717  | 1.810286  |
| H  | 1.293832  | -0.787627 | 2.090159  |
| N  | 1.465970  | 0.081486  | -1.354420 |
| H  | 1.504904  | -0.847974 | -1.804207 |
| H  | 1.294570  | 0.776945  | -2.095682 |
| C  | -2.760549 | 0.385327  | -0.660138 |
| H  | -3.628532 | 0.109172  | -1.291076 |
| H  | -2.790558 | 1.475802  | -0.477311 |
| C  | -2.760172 | -0.383283 | 0.660261  |
| H  | -3.628766 | -0.108332 | 1.290905  |
| H  | -2.788252 | -1.473832 | 0.477628  |
| C  | 2.760829  | -0.384626 | 0.659890  |
| H  | 2.791764  | -1.475022 | 0.476710  |
| H  | 3.628579  | -0.107980 | 1.290925  |
| C  | 2.759860  | 0.384330  | -0.660292 |
| H  | 2.786934  | 1.474858  | -0.477400 |
| H  | 3.628737  | 0.110282  | -1.290951 |
| Cl | -0.002530 | -2.300695 | -0.167292 |
| Cl | 0.002538  | 2.300375  | 0.167505  |



Cpx13: *trans*-[Co(en)<sub>2</sub>(NO<sub>2</sub>)<sub>2</sub>]<sup>+</sup> – en =  
ethylenediamine

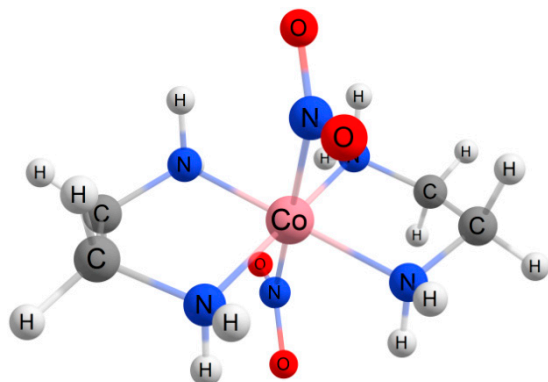

31

|    |           |           |           |
|----|-----------|-----------|-----------|
| Co | 0.000125  | 0.000081  | 0.000042  |
| N  | -1.458457 | 0.106743  | -1.351463 |
| H  | -1.258215 | 0.857557  | -2.031498 |
| H  | -1.471569 | -0.787394 | -1.871903 |
| N  | -1.458430 | -0.107980 | 1.351441  |
| H  | -1.257591 | -0.859042 | 2.031024  |
| H  | -1.472154 | 0.785881  | 1.872326  |
| N  | 1.458552  | -0.107183 | 1.351563  |
| H  | 1.472997  | 0.785514  | 1.874296  |
| H  | 1.257539  | -0.859553 | 2.029720  |
| N  | 1.458451  | 0.108683  | -1.351467 |
| H  | 1.472781  | -0.783403 | -1.875247 |
| H  | 1.257091  | 0.861923  | -2.028566 |
| C  | -2.767114 | 0.375878  | -0.665366 |
| H  | -3.622095 | 0.072704  | -1.300840 |
| H  | -2.838618 | 1.467334  | -0.499131 |
| C  | -2.766940 | -0.377729 | 0.665282  |
| H  | -3.622077 | -0.075001 | 1.300754  |
| H  | -2.837891 | -1.469217 | 0.499041  |
| C  | 2.767199  | -0.376477 | 0.665281  |
| H  | 2.838264  | -1.467934 | 0.498983  |
| H  | 3.622225  | -0.073652 | 1.300841  |
| C  | 2.767284  | 0.377356  | -0.665231 |
| H  | 2.838849  | 1.468779  | -0.498884 |
| H  | 3.622122  | 0.074183  | -1.300867 |
| N  | -0.000834 | 1.962006  | 0.124204  |
| N  | 0.000669  | -1.961857 | -0.124236 |
| O  | 0.004207  | 2.640917  | -0.924967 |
| O  | -0.006587 | 2.494751  | 1.256883  |
| O  | -0.004600 | -2.494556 | -1.256935 |
| O  | 0.006072  | -2.640853 | 0.924858  |

Cpx14: *trans*-[Co(en)<sub>2</sub>(NCS)<sub>2</sub>]<sup>+</sup> – en =  
ethylenediamine

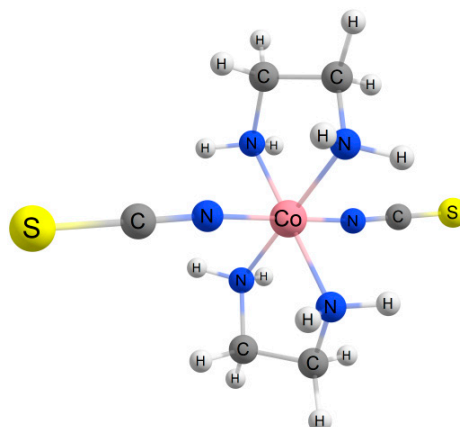

31

|    |           |           |           |
|----|-----------|-----------|-----------|
| Co | -0.000152 | 0.000713  | -0.000315 |
| N  | -0.364334 | -1.445178 | -1.342955 |
| H  | -1.113627 | -1.206184 | -2.009383 |
| H  | 0.501279  | -1.562657 | -1.893201 |
| N  | 0.085487  | -1.491495 | 1.338172  |
| H  | 0.867521  | -1.389735 | 2.002045  |
| H  | -0.784675 | -1.458504 | 1.892466  |
| N  | 0.364221  | 1.446696  | 1.342356  |
| H  | -0.501733 | 1.564998  | 1.891887  |
| H  | 1.112869  | 1.207232  | 2.009341  |
| N  | -0.085849 | 1.493136  | -1.338975 |
| H  | 0.783892  | 1.459472  | -1.893881 |
| H  | -0.868495 | 1.392064  | -2.002234 |
| C  | -0.701239 | -2.716846 | -0.622909 |
| H  | -0.560009 | -3.594758 | -1.283614 |
| H  | -1.767919 | -2.671172 | -0.334047 |
| C  | 0.196467  | -2.797841 | 0.609302  |
| H  | -0.089915 | -3.643621 | 1.264972  |
| H  | 1.254634  | -2.928293 | 0.315483  |
| C  | 0.702480  | 2.717807  | 0.622059  |
| H  | 1.769056  | 2.670909  | 0.333062  |
| H  | 0.562275  | 3.596014  | 1.282599  |
| C  | -0.195363 | 2.799541  | -0.609986 |
| H  | -1.253351 | 2.930930  | -0.315866 |
| H  | 0.091572  | 3.645106  | -1.265691 |
| N  | -1.873929 | 0.187810  | 0.325853  |
| N  | 1.873635  | -0.186019 | -0.326391 |
| C  | -3.065829 | 0.151898  | 0.180178  |
| C  | 3.065492  | -0.153001 | -0.179590 |
| S  | -4.685895 | 0.125488  | 0.042538  |
| S  | 4.685524  | -0.130179 | -0.040423 |

Cpx15: *trans*-[Co(NH<sub>3</sub>)<sub>4</sub>(NO<sub>2</sub>)<sub>2</sub>]<sup>+</sup>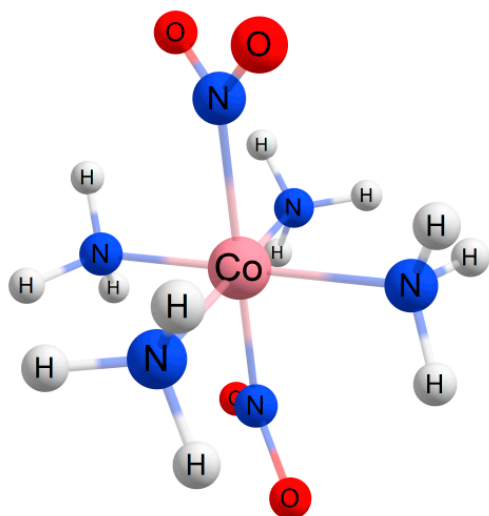

23

|    |           |           |           |
|----|-----------|-----------|-----------|
| Co | 0.000012  | 0.000008  | -0.000015 |
| N  | -1.971805 | 0.000016  | 0.000047  |
| N  | 0.000495  | -1.437402 | 1.375155  |
| N  | -0.000306 | 1.437870  | 1.374701  |
| N  | 1.971786  | -0.000004 | -0.000077 |
| O  | 2.579823  | -1.089650 | -0.068427 |
| O  | 2.579772  | 1.089715  | 0.068311  |
| N  | 0.000273  | 1.437449  | -1.375158 |
| N  | -0.000496 | -1.437976 | -1.374632 |
| H  | 0.805654  | 2.069102  | -1.230140 |
| H  | 0.052904  | 1.127208  | -2.357746 |
| H  | -0.873309 | 1.984500  | -1.284100 |
| H  | -0.053840 | 1.127712  | 2.357261  |
| H  | -0.805084 | 2.070140  | 1.229127  |
| H  | 0.873804  | 1.984172  | 1.284141  |
| H  | 0.052261  | -1.127064 | 2.357754  |
| H  | -0.872631 | -1.985106 | 1.283644  |
| H  | 0.806403  | -2.068477 | 1.230577  |
| H  | -0.807064 | -2.068322 | -1.230526 |
| H  | -0.051093 | -1.127912 | -2.357379 |
| H  | 0.872115  | -1.986342 | -1.282226 |
| O  | -2.579814 | 1.089684  | -0.068281 |
| O  | -2.579790 | -1.089686 | 0.068369  |

Cpx16: *cis*-[Co(NH<sub>3</sub>)<sub>4</sub>(NO<sub>2</sub>)<sub>2</sub>]<sup>+</sup>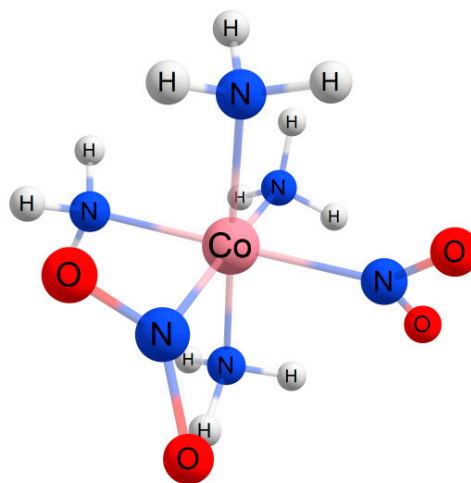

23

|    |           |           |           |
|----|-----------|-----------|-----------|
| Co | 0.000065  | 0.422331  | -0.000040 |
| N  | 1.461304  | 1.837893  | 0.230986  |
| N  | 0.387136  | 0.364337  | -1.956500 |
| N  | -1.460898 | 1.838169  | -0.231218 |
| N  | -1.369007 | -0.943479 | -0.255334 |
| O  | -1.231871 | -1.795226 | -1.150363 |
| O  | -2.379590 | -0.917587 | 0.481396  |
| N  | -0.386981 | 0.364871  | 1.956452  |
| N  | 1.368778  | -0.943763 | 0.255454  |
| H  | -1.376226 | 0.076321  | 2.054799  |
| H  | 0.184320  | -0.391650 | 2.370981  |
| H  | -0.244670 | 1.221326  | 2.512923  |
| H  | -1.595931 | 2.166866  | -1.199890 |
| H  | -1.330683 | 2.689602  | 0.336785  |
| H  | -2.364394 | 1.430005  | 0.060615  |
| H  | 1.330667  | 2.689651  | -0.336433 |
| H  | 1.597097  | 2.166052  | 1.199739  |
| H  | 2.364594  | 1.429894  | -0.061717 |
| H  | 0.244933  | 1.220591  | -2.513319 |
| H  | 1.376336  | 0.075610  | -2.054797 |
| H  | -0.184306 | -0.392264 | -2.370716 |
| O  | 1.231169  | -1.795547 | 1.150368  |
| O  | 2.379565  | -0.918035 | -0.480996 |

Cpx17: *fac*-[Co(CN)<sub>3</sub>(NH<sub>3</sub>)<sub>3</sub>]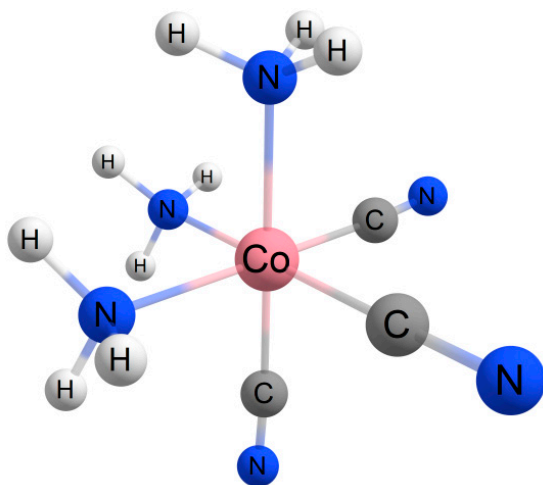

19

|    |           |           |           |
|----|-----------|-----------|-----------|
| Co | 0.001679  | -0.000312 | -0.180775 |
| N  | 1.142874  | 1.244038  | -1.362404 |
| N  | 0.543328  | -1.599770 | -1.361637 |
| N  | -1.624936 | 0.328238  | -1.401379 |
| H  | 2.146163  | 1.015058  | -1.296223 |
| H  | 0.912192  | 1.244367  | -2.368118 |
| H  | 1.053083  | 2.221708  | -1.047570 |
| H  | 1.488255  | -1.932152 | -1.117455 |
| H  | -0.086469 | -2.402511 | -1.212957 |
| H  | 0.552341  | -1.421502 | -2.377699 |
| H  | -1.418228 | 0.388066  | -2.410503 |
| H  | -2.334536 | -0.412568 | -1.296137 |
| H  | -2.096445 | 1.210743  | -1.152301 |
| C  | -1.037164 | -1.141942 | 0.891629  |
| C  | 1.494379  | -0.307267 | 0.919948  |
| C  | -0.496935 | 1.466537  | 0.882738  |
| N  | 2.470923  | -0.511291 | 1.551399  |
| N  | -1.712741 | -1.886645 | 1.510579  |
| N  | -0.822786 | 2.424464  | 1.491157  |

Cpx18: [Co(NH<sub>3</sub>)<sub>5</sub>(CO<sub>3</sub>)]<sup>+</sup>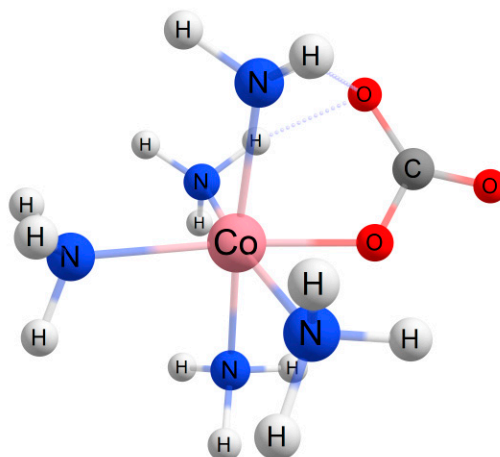

25

|    |           |           |           |
|----|-----------|-----------|-----------|
| Co | 0.672029  | 0.012133  | -0.003319 |
| N  | 2.597559  | -0.673012 | 0.007218  |
| N  | 1.084134  | 1.356154  | 1.428511  |
| N  | 0.077975  | -1.315037 | 1.350254  |
| N  | 0.063047  | -1.280271 | -1.385554 |
| N  | 1.065558  | 1.379153  | -1.419656 |
| H  | -0.934193 | -1.453339 | -1.063862 |
| H  | 0.029758  | -0.917192 | -2.349674 |
| H  | 0.560879  | -2.182119 | -1.433819 |
| H  | 0.050649  | -0.976245 | 2.323311  |
| H  | 0.590994  | -2.209429 | 1.368444  |
| H  | -0.920185 | -1.488483 | 1.033977  |
| H  | 2.986021  | -0.757528 | 0.959812  |
| H  | 2.722236  | -1.603675 | -0.421516 |
| H  | 3.251436  | -0.055415 | -0.498935 |
| H  | 1.302589  | 0.971225  | 2.361066  |
| H  | 1.834519  | 2.036980  | 1.231062  |
| H  | 0.201885  | 1.887488  | 1.521568  |
| H  | 1.695610  | 2.155760  | -1.163420 |
| H  | 1.424397  | 1.016259  | -2.316843 |
| H  | 0.138041  | 1.798672  | -1.601744 |
| O  | -1.092610 | 0.812888  | 0.006310  |
| C  | -2.296496 | 0.149668  | 0.009666  |
| O  | -3.315393 | 0.873820  | 0.026451  |
| O  | -2.281789 | -1.151392 | -0.005664 |

Cpx19: *cis*-[Co(NH<sub>3</sub>)<sub>4</sub>(CO<sub>3</sub>)]<sup>+</sup>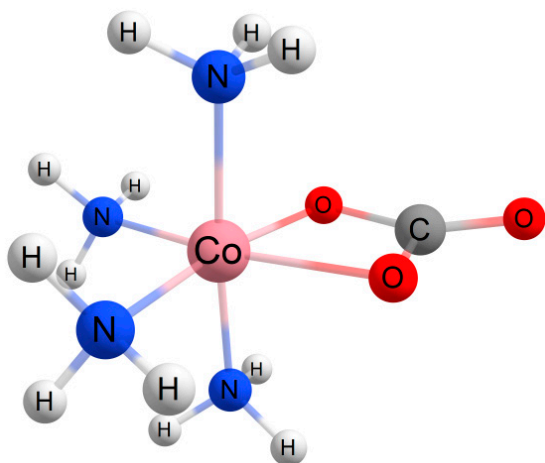

21

|    |           |           |           |
|----|-----------|-----------|-----------|
| Co | -0.432368 | 0.000020  | -0.000032 |
| N  | -1.779057 | 0.019592  | -1.505438 |
| N  | -0.359055 | -1.986440 | -0.019417 |
| N  | -1.779075 | -0.019671 | 1.505420  |
| O  | 1.157140  | -0.011337 | 1.093048  |
| N  | -0.359164 | 1.986423  | 0.019453  |
| O  | 1.157157  | 0.011439  | -1.093047 |
| H  | 0.174815  | 2.288933  | 0.849663  |
| H  | 0.179258  | 2.304970  | -0.801754 |
| H  | -1.245959 | 2.514221  | 0.021786  |
| H  | -2.471300 | -0.784638 | 1.475909  |
| H  | -2.334062 | 0.844491  | 1.605651  |
| H  | -1.269412 | -0.130729 | 2.396845  |
| H  | -2.333823 | -0.844734 | -1.605440 |
| H  | -2.471498 | 0.784354  | -1.475811 |
| H  | -1.269590 | 0.130681  | -2.396966 |
| H  | -1.245766 | -2.514384 | -0.021637 |
| H  | 0.175005  | -2.289116 | -0.849514 |
| H  | 0.179376  | -2.304731 | 0.801888  |
| C  | 1.941394  | 0.000023  | 0.000001  |
| O  | 3.172327  | -0.000018 | 0.000011  |

Cpx20: [Co(CN)<sub>5</sub>(NO<sub>2</sub>)]<sup>3-</sup>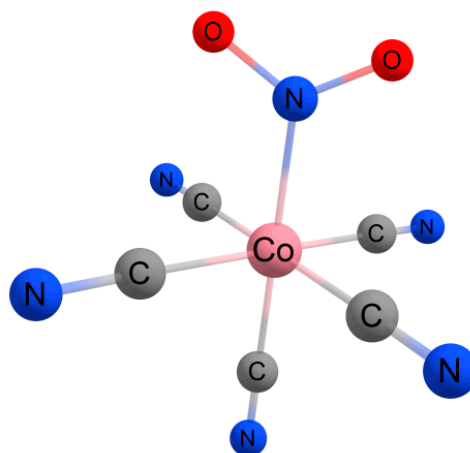

14

|    |           |           |           |
|----|-----------|-----------|-----------|
| Co | 0.193982  | -0.000020 | 0.000002  |
| C  | 0.199291  | -1.321716 | -1.407474 |
| N  | 0.222367  | -2.126084 | -2.273643 |
| C  | 2.115448  | -0.000119 | 0.000015  |
| C  | 0.199456  | 1.321781  | 1.407397  |
| N  | 3.298047  | -0.000224 | 0.000107  |
| N  | 0.222568  | 2.126320  | 2.273406  |
| C  | 0.207737  | 1.398530  | -1.331172 |
| C  | 0.207661  | -1.398557 | 1.331169  |
| N  | 0.240663  | 2.247795  | -2.153039 |
| N  | 0.240449  | -2.247830 | 2.153034  |
| N  | -1.838587 | 0.000028  | 0.000037  |
| O  | -2.469550 | 1.081563  | 0.005622  |
| O  | -2.469652 | -1.081441 | -0.005496 |

Cpx21:  $[\text{Co}(\text{NH}_3)(\text{CN})_5]^{2-}$ 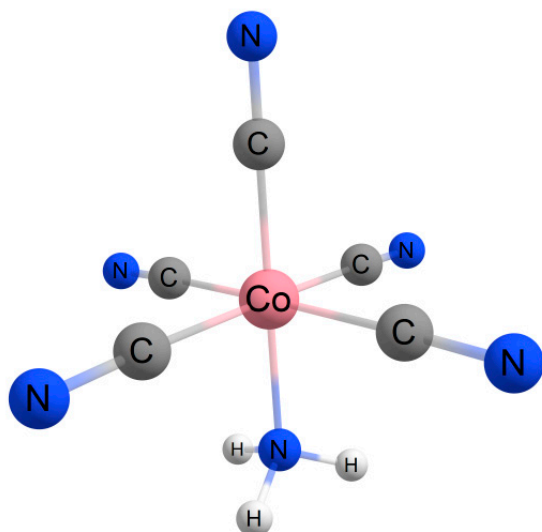

15

|    |           |           |           |
|----|-----------|-----------|-----------|
| Co | -0.000216 | -0.002431 | -0.076383 |
| C  | -1.413444 | 1.310938  | -0.103117 |
| N  | -2.274297 | 2.118199  | -0.161428 |
| C  | 0.001351  | 0.000489  | 1.804639  |
| C  | 1.412613  | -1.314591 | -0.100847 |
| N  | 0.002352  | 0.001621  | 2.986485  |
| N  | 2.278687  | -2.115760 | -0.167182 |
| C  | -1.313660 | -1.413840 | -0.099461 |
| C  | 1.312896  | 1.411072  | -0.105579 |
| N  | -2.121251 | -2.273809 | -0.167770 |
| N  | 2.115212  | 2.276515  | -0.163764 |
| H  | -0.089460 | 0.957934  | -2.525535 |
| H  | 0.869578  | -0.394327 | -2.525516 |
| H  | -0.779783 | -0.549421 | -2.524556 |
| N  | 0.000290  | 0.005668  | -2.145749 |

Cpx22: *mer*- $[\text{Co}(\text{CN})_3(\text{NH}_3)_3]$ 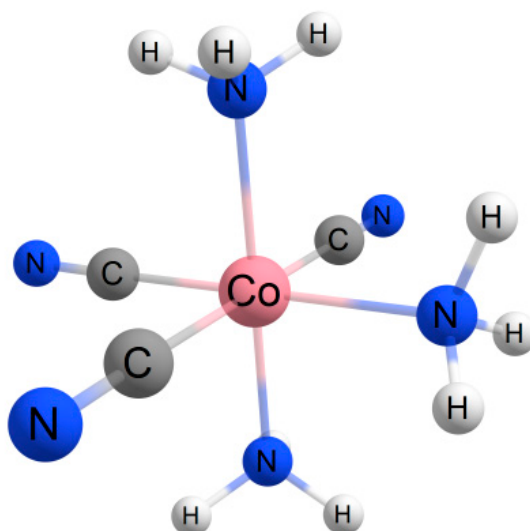

19

|    |           |           |           |
|----|-----------|-----------|-----------|
| Co | -0.000002 | -0.105912 | -0.001264 |
| C  | -0.000472 | 1.777919  | -0.001963 |
| N  | -0.000260 | 2.958062  | 0.016976  |
| C  | 1.931187  | -0.119898 | 0.000109  |
| C  | -1.931238 | -0.122359 | 0.001373  |
| N  | 3.110452  | -0.167181 | -0.002228 |
| N  | -3.110515 | -0.168901 | 0.001172  |
| H  | -0.040224 | -1.022608 | -2.435742 |
| H  | -0.813365 | 0.436336  | -2.377697 |
| H  | 0.842824  | 0.373578  | -2.381505 |
| H  | -0.018868 | -2.574099 | 0.940955  |
| H  | -0.815601 | -2.567912 | -0.492994 |
| H  | 0.843616  | -2.563871 | -0.455349 |
| H  | 0.005121  | 0.860513  | 2.364310  |
| H  | -0.834213 | -0.560751 | 2.410338  |
| H  | 0.832696  | -0.567686 | 2.409790  |
| N  | -0.002965 | -0.083413 | -2.010920 |
| N  | 0.002452  | -2.169273 | -0.007596 |
| N  | 0.001009  | -0.107560 | 2.010441  |

Cpx23: *cis*-[Co(CN)<sub>2</sub>(en)<sub>2</sub>]<sup>+</sup> – en = ethylenediamine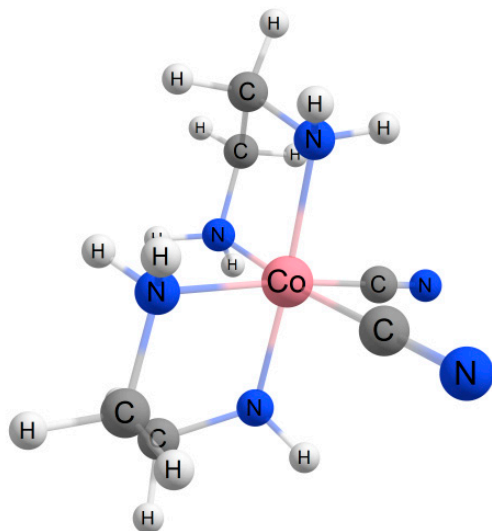

29

|    |           |           |           |
|----|-----------|-----------|-----------|
| C  | -2.370964 | -1.045243 | 1.104441  |
| H  | -3.358177 | -0.909191 | 1.588612  |
| H  | -1.894758 | -1.935684 | 1.557536  |
| N  | -1.483511 | 0.138839  | 1.356092  |
| H  | -1.134354 | 0.138007  | 2.326478  |
| H  | -2.022562 | 1.013190  | 1.262142  |
| Co | 0.000054  | 0.197798  | -0.000046 |
| C  | -2.509056 | -1.210946 | -0.406958 |
| H  | -3.061862 | -2.136650 | -0.660154 |
| H  | -3.053302 | -0.352687 | -0.843947 |
| N  | -1.127260 | -1.220071 | -0.997413 |
| H  | -1.188040 | -1.015237 | -2.006001 |
| H  | -0.737806 | -2.174543 | -0.941784 |
| C  | 2.509527  | -1.210245 | 0.407453  |
| H  | 3.062370  | -2.135758 | 0.661245  |
| H  | 3.054193  | -0.351645 | 0.843257  |
| N  | 1.128084  | -1.218567 | 0.998761  |
| H  | 1.189432  | -1.011320 | 2.006811  |
| H  | 0.738757  | -2.173227 | 0.945616  |
| C  | 2.370701  | -1.045932 | -1.104022 |
| H  | 3.357701  | -0.910516 | -1.588809 |
| H  | 1.894045  | -1.936660 | -1.556082 |
| N  | 1.483363  | 0.138117  | -1.356268 |
| H  | 1.133884  | 0.136555  | -2.326537 |
| H  | 2.022541  | 1.012492  | -1.263226 |
| C  | 0.887994  | 1.541496  | 0.979627  |
| C  | -0.888464 | 1.540353  | -0.980734 |
| N  | 1.455505  | 2.366426  | 1.603679  |
| N  | -1.456462 | 2.364602  | -1.605245 |

Cpx24: *trans*-[Co(NH<sub>3</sub>)<sub>4</sub>(NO<sub>2</sub>)Cl]<sup>+</sup>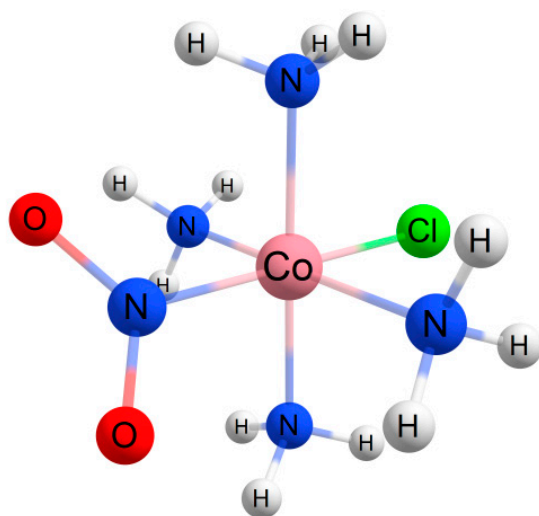

21

|    |           |           |           |
|----|-----------|-----------|-----------|
| Co | -0.126129 | -0.000080 | 0.000002  |
| N  | -0.148343 | 1.469724  | -1.344734 |
| N  | -0.136899 | 1.393115  | 1.424621  |
| N  | -0.149376 | -1.469808 | 1.344441  |
| N  | -0.136672 | -1.393228 | -1.424587 |
| H  | -0.160636 | 1.160824  | -2.328934 |
| H  | -0.994925 | 2.048122  | -1.227048 |
| H  | 0.686601  | 2.070436  | -1.236287 |
| H  | -0.008056 | -1.039075 | -2.385255 |
| H  | 0.619707  | -2.080889 | -1.271941 |
| H  | -1.044242 | -1.884928 | -1.422792 |
| H  | 0.683455  | -2.073207 | 1.234658  |
| H  | -0.158968 | -1.161416 | 2.328850  |
| H  | -0.997907 | -2.045578 | 1.227820  |
| H  | -1.045266 | 1.883300  | 1.422493  |
| H  | -0.007615 | 1.039349  | 2.385310  |
| H  | 0.618499  | 2.081657  | 1.271273  |
| Cl | -2.461346 | 0.000293  | -0.000137 |
| N  | 1.801786  | -0.000054 | 0.000163  |
| O  | 2.402842  | -1.093164 | 0.010481  |
| O  | 2.402689  | 1.093209  | -0.009883 |

Cpx25:  $[\text{Co}(\text{en})(\text{CN})_4]^-$  – en = ethylenediamine

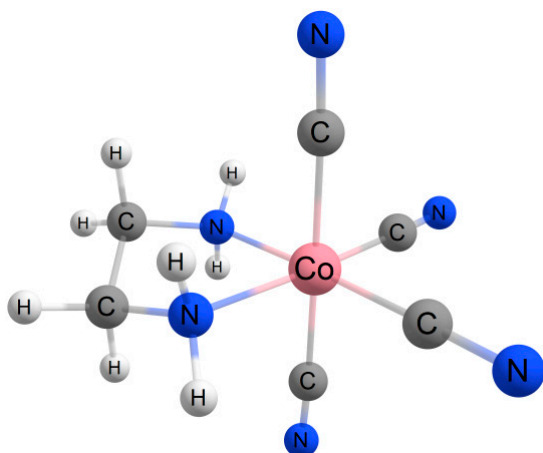

15

|    |           |           |           |
|----|-----------|-----------|-----------|
| Co | -0.000216 | -0.002431 | -0.076383 |
| C  | -1.413444 | 1.310938  | -0.103117 |
| N  | -2.274297 | 2.118199  | -0.161428 |
| C  | 0.001351  | 0.000489  | 1.804639  |
| C  | 1.412613  | -1.314591 | -0.100847 |
| N  | 0.002352  | 0.001621  | 2.986485  |
| N  | 2.278687  | -2.115760 | -0.167182 |
| C  | -1.313660 | -1.413840 | -0.099461 |
| C  | 1.312896  | 1.411072  | -0.105579 |
| N  | -2.121251 | -2.273809 | -0.167770 |
| N  | 2.115212  | 2.276515  | -0.163764 |
| H  | -0.089460 | 0.957934  | -2.525535 |
| H  | 0.869578  | -0.394327 | -2.525516 |
| H  | -0.779783 | -0.549421 | -2.524556 |
| N  | 0.000290  | 0.005668  | -2.145749 |

Cpx26:  $[\text{Co}(\text{OH}_2)_6]^{3+}$

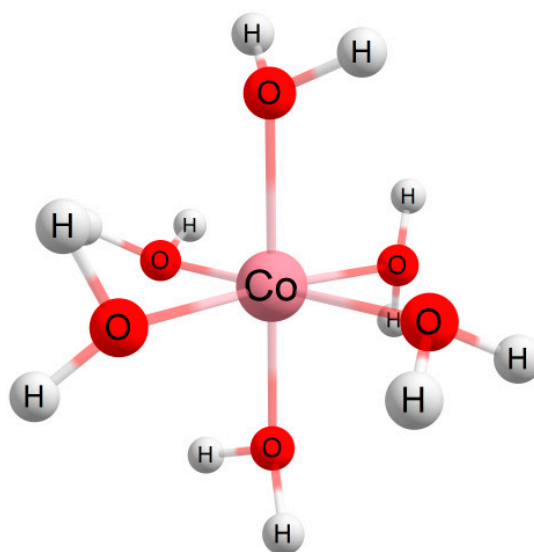

19

|    |           |           |           |
|----|-----------|-----------|-----------|
| Co | -0.006932 | -0.012323 | 0.011026  |
| O  | 1.466242  | -0.086803 | 1.272801  |
| H  | 1.309820  | -0.316840 | 2.219975  |
| H  | 2.022605  | 0.730082  | 1.257243  |
| O  | -0.949466 | 1.436672  | 0.893458  |
| H  | -0.885378 | 1.582517  | 1.866454  |
| H  | -1.901224 | 1.510609  | 0.641739  |
| O  | 1.057624  | -1.240240 | -1.047452 |
| H  | 0.639097  | -1.980528 | -1.547534 |
| H  | 1.816797  | -1.620174 | -0.541947 |
| O  | -1.029370 | -1.426189 | 0.865889  |
| H  | -1.501907 | -1.208997 | 1.705431  |
| H  | -0.587727 | -2.295720 | 1.019296  |
| O  | -1.481420 | 0.051332  | -1.252458 |
| H  | -2.051157 | -0.755198 | -1.205462 |
| H  | -1.307369 | 0.220169  | -2.209585 |
| O  | 1.017699  | 1.394527  | -0.839621 |
| H  | 0.553922  | 2.260910  | -0.934663 |
| H  | 1.429207  | 1.171495  | -1.709595 |



Cpx27: *trans*-[Co(DH)<sub>2</sub>(CN)(py)] – py = pyridine,  
DH = dimethylglyoximato

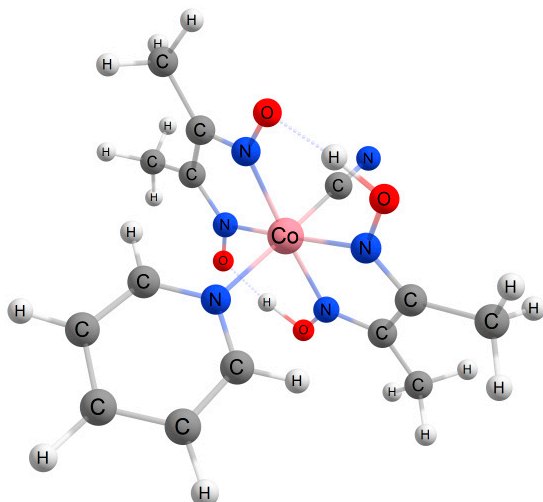

44

|    |          |          |          |
|----|----------|----------|----------|
| Co | -0.00114 | -0.47665 | 0.00279  |
| H  | 3.71924  | -0.59648 | -2.63481 |
| H  | 0.22031  | -0.51510 | -2.69136 |
| O  | 1.29837  | -0.52005 | -2.59694 |
| C  | 3.95480  | -0.67367 | -1.56002 |
| H  | 4.66836  | 0.12991  | -1.28757 |
| H  | 4.46845  | -1.64067 | -1.37766 |
| O  | -1.21571 | -0.53287 | -2.56439 |
| N  | 1.48525  | -0.50288 | -1.26408 |
| C  | 2.69511  | -0.57816 | -0.74243 |
| H  | -3.60623 | -1.23926 | -2.57484 |
| H  | 4.56987  | -1.51787 | 1.26614  |
| N  | -1.43606 | -0.57617 | -1.27495 |
| C  | 2.69794  | -0.56785 | 0.73970  |
| N  | -0.08003 | 1.60349  | -0.00513 |
| C  | 3.96141  | -0.63690 | 1.55425  |
| C  | -3.88103 | -0.85727 | -1.57433 |
| C  | -2.64114 | -0.72685 | -0.72849 |
| H  | -4.38253 | 0.12490  | -1.71669 |
| N  | 1.48994  | -0.48599 | 1.26459  |
| H  | 4.59042  | 0.26206  | 1.38683  |
| H  | -4.61762 | -1.53977 | -1.10958 |
| H  | 3.71925  | -0.70311 | 2.62839  |
| C  | -2.64197 | -0.71747 | 0.74084  |
| N  | -1.43507 | -0.57069 | 1.28596  |
| O  | 1.30818  | -0.47071 | 2.59809  |
| C  | -3.88882 | -0.84993 | 1.57661  |
| O  | -1.20393 | -0.53106 | 2.57353  |
| H  | -4.65174 | -0.09741 | 1.29067  |
| H  | 0.23013  | -0.48258 | 2.69500  |
| H  | -4.35331 | -1.85068 | 1.44865  |
| H  | -3.63339 | -0.71666 | 2.64234  |
| C  | 0.03766  | -2.37154 | 0.01058  |
| N  | 0.07709  | -3.54967 | 0.01523  |
| C  | 1.05794  | 2.34638  | -0.00664 |
| C  | -1.26732 | 2.26509  | -0.00845 |
| C  | 1.05156  | 3.74883  | -0.01103 |
| C  | -0.17778 | 4.42912  | -0.01413 |
| C  | -1.35666 | 3.66508  | -0.01291 |
| H  | 2.00927  | 1.80413  | -0.00418 |
| H  | 2.00794  | 4.28869  | -0.01187 |
| H  | -0.21591 | 5.52754  | -0.01741 |
| H  | -2.34786 | 4.13803  | -0.01521 |
| H  | -2.17723 | 1.65533  | -0.00682 |

Cpx28: *trans*-[Co(DH)<sub>2</sub>(CN)<sub>2</sub>]<sup>-</sup> – DH =  
dimethylglyoximato

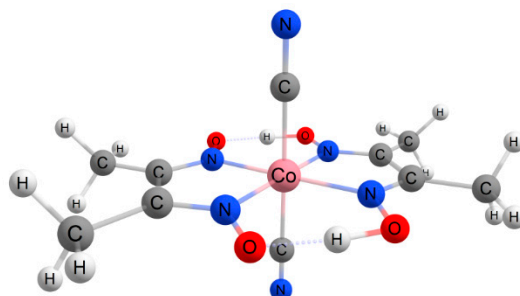

35

|    |           |           |           |
|----|-----------|-----------|-----------|
| Co | -0.017577 | -0.000017 | -0.000019 |
| H  | 3.696815  | 2.633145  | 0.047992  |
| H  | 0.185829  | 2.682649  | 0.001614  |
| O  | 1.274111  | 2.593638  | -0.004678 |
| C  | 3.940011  | 1.558289  | -0.005693 |
| H  | 4.590184  | 1.294227  | 0.853292  |
| H  | 4.529732  | 1.373751  | -0.927826 |
| O  | -1.230498 | 2.572915  | 0.009534  |
| N  | 1.464755  | 1.261173  | -0.000252 |
| C  | 2.676016  | 0.738848  | -0.000433 |
| H  | -3.665118 | 2.634297  | -0.051397 |
| H  | 4.590865  | -1.293364 | -0.852673 |
| N  | -1.459111 | 1.280285  | 0.003434  |
| C  | 2.676030  | -0.738802 | 0.000125  |
| C  | 3.940036  | -1.558224 | 0.005553  |
| C  | -3.930077 | 1.563822  | 0.006071  |
| C  | -2.671363 | 0.733323  | 0.001501  |
| H  | -4.524339 | 1.395753  | 0.929208  |
| N  | 1.464784  | -1.261150 | -0.000025 |
| H  | 4.529039  | -1.374527 | 0.928324  |
| H  | -4.586838 | 1.310318  | -0.851832 |
| H  | 3.696908  | -2.633039 | -0.049257 |
| C  | -2.671384 | -0.733333 | -0.001275 |
| N  | -1.459137 | -1.280327 | -0.003170 |
| O  | 1.274220  | -2.593666 | 0.004531  |
| C  | -3.930140 | -1.563777 | -0.005922 |
| O  | -1.230533 | -2.572925 | -0.009298 |
| H  | -4.587373 | -1.309618 | 0.851418  |
| H  | 0.186104  | -2.682723 | -0.001601 |
| H  | -4.523881 | -1.396288 | -0.929516 |
| H  | -3.665264 | -2.634224 | 0.052379  |
| C  | -0.034903 | 0.003010  | -1.935126 |
| N  | -0.037236 | 0.004851  | -3.115039 |
| C  | -0.034348 | -0.003043 | 1.935138  |
| N  | -0.036307 | -0.004873 | 3.115058  |



Cpx29: *trans*-[Co(DH)<sub>2</sub>(CH<sub>3</sub>)(OH<sub>2</sub>)] – DH = dimethylglyoximato

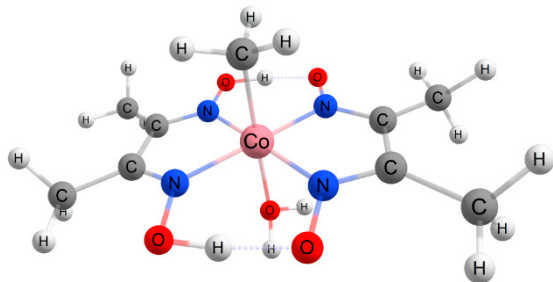

38

|    |          |          |          |
|----|----------|----------|----------|
| Co | -0.01074 | -0.00130 | 0.05513  |
| H  | 3.66364  | 2.65039  | -0.08734 |
| H  | 0.18385  | 2.69016  | 0.11732  |
| O  | 1.27258  | 2.59886  | 0.10220  |
| C  | 3.92487  | 1.57942  | -0.04253 |
| H  | 4.54644  | 1.40607  | 0.86087  |
| H  | 4.55022  | 1.32595  | -0.92270 |
| O  | -1.22866 | 2.57415  | 0.09266  |
| N  | 1.45482  | 1.25820  | 0.06279  |
| C  | 2.67128  | 0.74537  | -0.00664 |
| H  | -0.90422 | 0.35787  | 2.45859  |
| H  | -3.64870 | 2.62451  | -0.08999 |
| H  | 4.82749  | -1.00820 | -0.01481 |
| N  | -1.44300 | 1.26984  | 0.08866  |
| C  | 2.66926  | -0.73348 | -0.03690 |
| C  | -0.00749 | -0.13973 | 2.04195  |
| C  | 3.89945  | -1.60006 | -0.09124 |
| H  | 0.90690  | 0.33252  | 2.45057  |
| C  | -3.91527 | 1.55435  | -0.03355 |
| C  | -2.65637 | 0.72741  | 0.01738  |
| H  | -4.54397 | 1.39371  | 0.86808  |
| N  | 1.45343  | -1.24672 | -0.00486 |
| H  | 3.87923  | -2.34380 | 0.73149  |
| H  | -4.53963 | 1.29175  | -0.91252 |
| H  | -0.02143 | -1.21790 | 2.29351  |
| H  | 3.92790  | -2.17968 | -1.03807 |
| C  | -2.65164 | -0.74281 | -0.00706 |
| N  | -1.43265 | -1.28005 | 0.02026  |
| O  | 1.29292  | -2.58886 | -0.01578 |
| C  | -3.90551 | -1.57742 | -0.05321 |
| O  | -1.21154 | -2.58201 | 0.01503  |
| H  | -4.59756 | -1.31511 | 0.77360  |
| H  | 0.20449  | -2.69408 | 0.00837  |
| H  | -4.46358 | -1.42399 | -1.00137 |
| H  | -3.63765 | -2.64569 | 0.02737  |
| O  | -0.05098 | 0.13826  | -2.08734 |
| H  | -0.18378 | 1.08146  | -2.32236 |
| H  | -0.85391 | -0.30121 | -2.44025 |

Cpx30: *trans*-[Co(DH)<sub>2</sub>(CH<sub>3</sub>)(OH<sub>2</sub>)] – DH = dimethylglyoximato

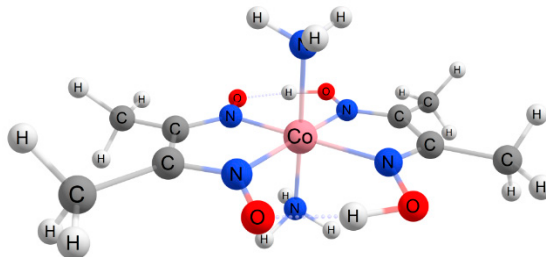

39

|    |           |           |           |
|----|-----------|-----------|-----------|
| Co | -0.027067 | -0.000016 | 0.000006  |
| H  | 3.709218  | 2.628863  | -0.044986 |
| H  | 0.225588  | 2.707178  | 0.057729  |
| O  | 1.294193  | 2.603308  | 0.079196  |
| C  | 3.942852  | 1.554240  | 0.038323  |
| H  | 4.504378  | 1.384824  | 0.980703  |
| H  | 4.611561  | 1.261687  | -0.795700 |
| O  | -1.225233 | 2.569754  | -0.008222 |
| N  | 1.467385  | 1.265374  | 0.041282  |
| C  | 2.677559  | 0.741528  | 0.019957  |
| H  | -3.670586 | 2.634529  | 0.037139  |
| H  | 4.504359  | -1.384686 | -0.980753 |
| N  | -1.460049 | 1.281832  | 0.020750  |
| C  | 2.677560  | -0.741496 | -0.019932 |
| C  | 3.942894  | -1.554145 | -0.038345 |
| C  | -3.931309 | 1.563515  | -0.020289 |
| C  | -2.674174 | 0.734709  | 0.004101  |
| H  | -4.598033 | 1.307650  | 0.828394  |
| N  | 1.467407  | -1.265361 | -0.041181 |
| H  | 4.611622  | -1.261506 | 0.795633  |
| H  | -4.508491 | 1.387150  | -0.952060 |
| H  | 3.709353  | -2.628782 | 0.044996  |
| C  | -2.674210 | -0.734663 | -0.004172 |
| N  | -1.460105 | -1.281854 | -0.020836 |
| O  | 1.294306  | -2.603373 | -0.079036 |
| C  | -3.931375 | -1.563427 | 0.020250  |
| O  | -1.225331 | -2.569736 | 0.008123  |
| H  | -4.508428 | -1.387191 | 0.952128  |
| H  | 0.225906  | -2.707277 | -0.057704 |
| H  | -4.598205 | -1.307424 | -0.828305 |
| H  | -3.670683 | -2.634441 | -0.037353 |
| H  | -0.106604 | 1.099810  | -2.301288 |
| H  | 0.779504  | -0.292592 | -2.438043 |
| H  | -0.872189 | -0.364545 | -2.405755 |
| H  | -0.105354 | -1.100026 | 2.301214  |
| H  | 0.778404  | 0.293852  | 2.438317  |
| H  | -0.873386 | 0.363047  | 2.405554  |
| N  | -0.057417 | -0.115964 | 1.993544  |
| N  | -0.057133 | 0.115849  | -1.993542 |

Cpx31: *trans*-[Co(DH)<sub>2</sub>(CH<sub>3</sub>)(MeIm)] – DH = dimethylglyoximate; MeIm = methylimidazole

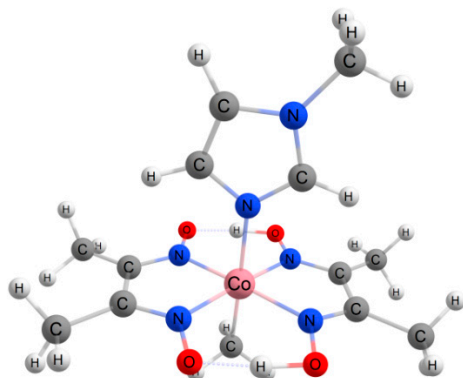

47

|    |           |           |           |
|----|-----------|-----------|-----------|
| Co | -0.202991 | -0.627711 | 0.038665  |
| H  | 3.278819  | -1.907890 | -2.575109 |
| H  | -0.103812 | -0.952363 | -2.628794 |
| O  | 0.973093  | -1.157870 | -2.547818 |
| C  | 3.584165  | -1.711277 | -1.532858 |
| H  | 4.346195  | -0.903050 | -1.538380 |
| H  | 4.075728  | -2.616656 | -1.123596 |
| O  | -1.477675 | -0.662910 | -2.508276 |
| N  | 1.191161  | -1.070142 | -1.217363 |
| C  | 2.384494  | -1.324072 | -0.707656 |
| H  | -3.969804 | -0.775928 | -2.414305 |
| H  | 3.943562  | -2.520274 | 1.564285  |
| N  | -1.649032 | -0.510071 | -1.207163 |
| C  | 2.420962  | -1.197676 | 0.763374  |
| C  | 3.660243  | -1.446256 | 1.583439  |
| C  | -4.091470 | -0.177792 | -1.491520 |
| C  | -2.839947 | -0.283085 | -0.657382 |
| H  | -4.290946 | 0.871031  | -1.804814 |
| N  | 1.250540  | -0.862019 | 1.282662  |
| H  | 4.525824  | -0.876670 | 1.189145  |
| H  | -4.982352 | -0.532087 | -0.939151 |
| H  | 3.484226  | -1.153349 | 2.632861  |
| C  | -2.799552 | -0.140553 | 0.804325  |
| N  | -1.582466 | -0.292590 | 1.323201  |
| O  | 1.101067  | -0.718947 | 2.615113  |
| C  | -4.012360 | 0.138948  | 1.656077  |
| O  | -1.333120 | -0.211079 | 2.618296  |
| H  | -4.588890 | 1.006336  | 1.274623  |
| H  | 0.022720  | -0.477497 | 2.712125  |
| H  | -4.706907 | -0.728629 | 1.677089  |
| H  | -3.691072 | 0.347771  | 2.691950  |
| C  | -0.607451 | -2.602862 | 0.137281  |
| H  | -0.705873 | -2.969690 | -0.902866 |
| H  | 0.218265  | -3.137854 | 0.645677  |
| H  | -1.552600 | -2.774586 | 0.687140  |
| N  | 0.177521  | 1.423957  | -0.121356 |
| C  | 1.372388  | 2.021865  | -0.021688 |
| C  | -0.744257 | 2.439804  | -0.338346 |
| H  | 2.330060  | 1.523906  | 0.154066  |
| C  | -0.086714 | 3.657515  | -0.369073 |
| H  | -1.811510 | 2.237536  | -0.458128 |
| H  | -0.449717 | 4.678646  | -0.514462 |
| N  | 1.258741  | 3.376061  | -0.165503 |
| C  | 2.353793  | 4.352371  | -0.116795 |
| H  | 2.445852  | 4.876042  | -1.087719 |
| H  | 2.166071  | 5.097413  | 0.679727  |
| H  | 3.298973  | 3.824519  | 0.099728  |

Cpx32: *trans*-[Co(DH)<sub>2</sub>(CH<sub>3</sub>)(py)] – DH = dimethylglyoximate; py = pyridine

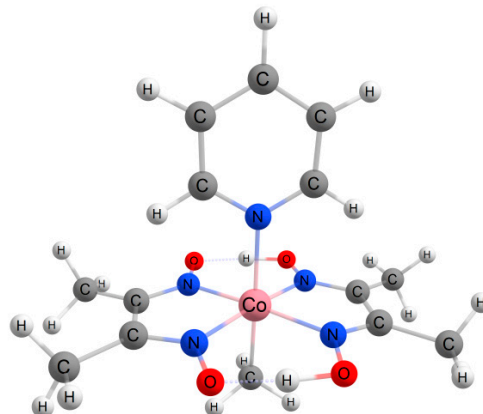

46

|    |           |           |           |
|----|-----------|-----------|-----------|
| Co | 0.001710  | -0.557350 | 0.017223  |
| H  | 3.700878  | -0.804971 | -2.606543 |
| H  | 0.190079  | -0.725555 | -2.662730 |
| O  | 1.283748  | -0.726439 | -2.570673 |
| C  | 3.942314  | -0.827412 | -1.530166 |
| H  | 4.650116  | -0.004011 | -1.303261 |
| H  | 4.470042  | -1.778022 | -1.305556 |
| O  | -1.216681 | -0.728831 | -2.550445 |
| N  | 1.468048  | -0.649480 | -1.234697 |
| C  | 2.682762  | -0.702391 | -0.713819 |
| H  | -3.604754 | -1.359126 | -2.538886 |
| H  | 4.538749  | -1.592181 | 1.356477  |
| N  | -1.427494 | -0.699160 | -1.247945 |
| C  | 2.681025  | -0.644215 | 0.762376  |
| N  | -0.057011 | 1.571143  | -0.039356 |
| C  | 3.939720  | -0.687716 | 1.588642  |
| C  | -3.881118 | -0.954461 | -1.547669 |
| C  | -2.639898 | -0.803410 | -0.705820 |
| H  | -4.386716 | 0.022117  | -1.714693 |
| N  | 1.463949  | -0.559295 | 1.276046  |
| H  | 4.586560  | 0.190380  | 1.381588  |
| H  | -4.618501 | -1.627192 | -1.068734 |
| H  | 3.686825  | -0.693603 | 2.662626  |
| C  | -2.638883 | -0.749113 | 0.762193  |
| N  | -1.422924 | -0.621760 | 1.294044  |
| O  | 1.280352  | -0.509379 | 2.610653  |
| C  | -3.885456 | -0.840211 | 1.605378  |
| O  | -1.206745 | -0.564264 | 2.595025  |
| H  | -4.640154 | -0.084971 | 1.303583  |
| H  | 0.179387  | -0.523322 | 2.703453  |
| H  | -4.368403 | -1.836430 | 1.510854  |
| H  | -3.621740 | -0.680929 | 2.665782  |
| C  | 1.085255  | 2.304989  | -0.068214 |
| C  | -1.237162 | 2.243398  | -0.052184 |
| C  | 1.092566  | 3.707861  | -0.110097 |
| C  | -0.131812 | 4.398309  | -0.123148 |
| C  | -1.317531 | 3.644284  | -0.093673 |
| H  | 2.031160  | 1.749874  | -0.057992 |
| H  | 2.052628  | 4.241396  | -0.132010 |
| H  | -0.160966 | 5.496762  | -0.155554 |
| H  | -2.304335 | 4.127041  | -0.102166 |
| H  | -2.150233 | 1.636102  | -0.027925 |
| C  | 0.028738  | -2.580133 | 0.001427  |
| H  | 0.036406  | -2.896434 | -1.059026 |
| H  | 0.937566  | -2.949786 | 0.513429  |
| H  | -0.871250 | -2.976191 | 0.507786  |

Reference:  $[\text{Co}(\text{CN})_6]^{3-}$

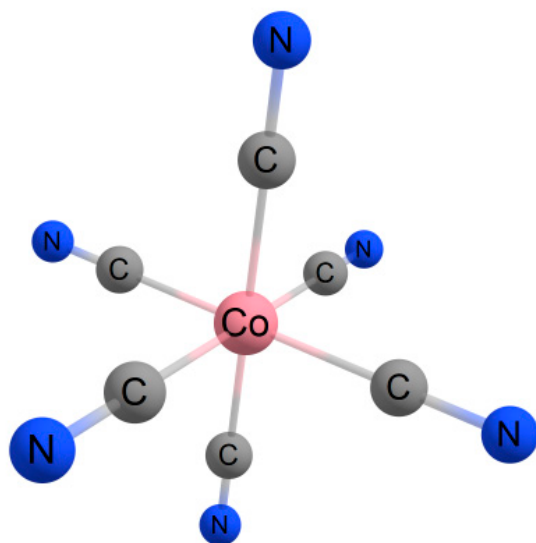

13

|    |           |           |           |
|----|-----------|-----------|-----------|
| Co | 0.000006  | -0.000007 | 0.000042  |
| C  | 0.933371  | 1.275542  | -1.107699 |
| N  | 1.504445  | 2.055748  | -1.787844 |
| C  | 1.166417  | -1.402286 | -0.632734 |
| N  | 1.881207  | -2.260770 | -1.019574 |
| C  | -1.166408 | 1.402261  | 0.632831  |
| C  | -0.933320 | -1.275596 | 1.107769  |
| N  | -1.881336 | 2.260922  | 1.019023  |
| N  | -1.504326 | -2.055872 | 1.787890  |
| C  | -1.224169 | -0.363970 | -1.447333 |
| C  | 1.224161  | 0.363983  | 1.447426  |
| N  | -1.975217 | -0.587317 | -2.332549 |
| N  | 1.975164  | 0.587374  | 2.332670  |

Cpx33:  $[\text{Co}(\text{acac})_3]$  – acac = acetylacetonato

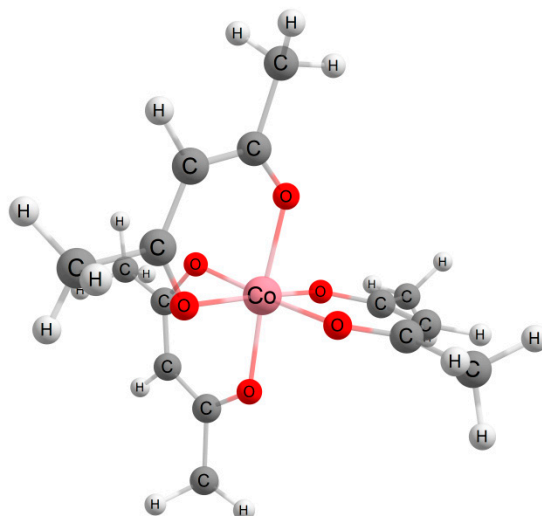

43

|    |           |           |           |
|----|-----------|-----------|-----------|
| Co | -0.005619 | -0.003410 | -0.004814 |
| O  | -0.395817 | 1.498004  | 1.144166  |
| O  | 1.470975  | -0.404824 | 1.161472  |
| O  | 1.226065  | 0.919671  | -1.157906 |
| O  | -1.424134 | 0.574933  | -1.169651 |
| O  | 0.196726  | -1.544143 | -1.147638 |
| O  | -1.108188 | -1.076515 | 1.148164  |
| C  | 1.131104  | -2.416260 | -1.003245 |
| C  | 2.125374  | -2.408345 | 0.005134  |
| C  | 2.230596  | -1.432681 | 1.025141  |
| C  | 1.140414  | -3.531489 | -2.046105 |
| C  | 3.311430  | -1.584344 | 2.091603  |
| H  | 0.179879  | -3.546560 | -2.591999 |
| H  | 1.318484  | -4.518235 | -1.575357 |
| H  | 1.958031  | -3.357469 | -2.776377 |
| H  | 3.473936  | -0.620412 | 2.607911  |
| H  | 4.263507  | -1.939495 | 1.651471  |
| H  | 2.988745  | -2.333961 | 2.844180  |
| C  | -2.654039 | 0.228860  | -1.027087 |
| C  | -2.381886 | -1.196311 | 1.015948  |
| C  | -3.165612 | -0.603721 | -0.002987 |
| C  | -3.611876 | 0.782073  | -2.078338 |
| C  | -3.066330 | -2.045016 | 2.083459  |
| H  | -3.066694 | 1.431677  | -2.786309 |
| H  | -4.424493 | 1.363711  | -1.597435 |
| H  | -4.087368 | -0.048555 | -2.638707 |
| H  | -2.319033 | -2.663289 | 2.613483  |
| H  | -3.844771 | -2.696147 | 1.640551  |
| H  | -3.563306 | -1.384913 | 2.824954  |
| C  | 1.545563  | 2.157175  | -1.016063 |
| C  | 0.143435  | 2.656776  | 1.003136  |
| C  | 1.065263  | 3.025753  | -0.005725 |
| C  | 2.514988  | 2.704002  | -2.060728 |
| C  | -0.270360 | 3.697432  | 2.041450  |
| H  | 2.945410  | 1.875247  | -2.651167 |
| H  | 3.329023  | 3.281925  | -1.580363 |
| H  | 1.979898  | 3.391394  | -2.748341 |
| H  | -1.081551 | 3.298052  | 2.676274  |
| H  | -0.609075 | 4.630086  | 1.547894  |
| H  | 0.594465  | 3.958293  | 2.685972  |
| H  | -4.244966 | -0.803626 | 0.000557  |
| H  | 1.431671  | 4.060537  | -0.004881 |
| H  | 2.856496  | -3.226630 | 0.005229  |

Cpx34: [Co(dbzm)<sub>3</sub>] – dbzm = dibenzoylmethanato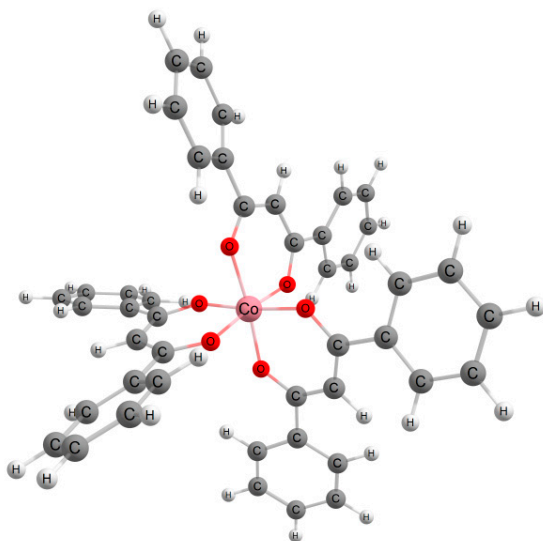

85

|    |           |           |           |
|----|-----------|-----------|-----------|
| Co | -0.006200 | 0.006023  | -0.001525 |
| O  | -1.033979 | 1.141991  | -1.156032 |
| O  | -1.449356 | -0.440927 | 1.179451  |
| O  | -0.525244 | -1.464394 | -1.115460 |
| O  | 1.151046  | -1.008687 | 1.141054  |
| O  | 1.488591  | 0.280691  | -1.169736 |
| O  | 0.333240  | 1.528406  | 1.113774  |
| C  | -2.293577 | 1.381246  | -1.011450 |
| C  | -3.106118 | 0.869852  | 0.032512  |
| C  | -2.654439 | 0.005142  | 1.061098  |
| C  | -2.881180 | 2.292579  | -2.057808 |
| C  | -2.010857 | 3.117880  | -2.814769 |
| C  | -2.516455 | 3.980460  | -3.801312 |
| C  | -3.900615 | 4.026983  | -4.061216 |
| C  | -4.774303 | 3.202266  | -3.325816 |
| C  | -4.271315 | 2.344432  | -2.331940 |
| C  | -3.609671 | -0.483026 | 2.119419  |
| C  | -3.279560 | -1.649942 | 2.855292  |
| C  | -4.145379 | -2.143412 | 3.845165  |
| C  | -5.352152 | -1.473971 | 4.130067  |
| C  | -5.684375 | -0.305554 | 3.416900  |
| C  | -4.823691 | 0.185172  | 2.419339  |
| C  | -0.114591 | -2.678172 | -0.965157 |
| C  | 0.800696  | -3.110012 | 0.028130  |
| C  | 1.386239  | -2.270354 | 1.009533  |
| C  | -0.673749 | -3.655041 | -1.967710 |
| C  | -0.664892 | -5.057385 | -1.757811 |
| C  | -1.200086 | -5.929972 | -2.721523 |
| C  | -1.751261 | -5.420061 | -3.913261 |
| C  | -1.772286 | -4.027898 | -4.130337 |
| C  | -1.245179 | -3.153526 | -3.165520 |
| C  | 2.348598  | -2.835421 | 2.023035  |
| C  | 2.600362  | -2.100386 | 3.209875  |
| C  | 3.488644  | -2.589120 | 4.182017  |
| C  | 4.153188  | -3.815745 | 3.983198  |
| C  | 3.921951  | -4.548931 | 2.802893  |
| C  | 3.027471  | -4.065416 | 1.831908  |
| C  | 2.351280  | 1.232397  | -1.045606 |
| C  | 2.308997  | 2.245798  | -0.053908 |
| C  | 1.317341  | 2.348001  | 0.954936  |
| C  | 3.450426  | 1.219426  | -2.076594 |
| C  | 4.683727  | 1.892377  | -1.885963 |

|   |           |           |           |
|---|-----------|-----------|-----------|
| C | 5.684375  | 1.847431  | -2.872419 |
| C | 5.471198  | 1.133281  | -4.067858 |
| C | 4.251512  | 0.456086  | -4.266392 |
| C | 3.253457  | 0.492216  | -3.278599 |
| C | 1.368187  | 3.464894  | 1.965501  |
| C | 2.081615  | 4.669239  | 1.739869  |
| C | 2.094795  | 5.686404  | 2.710420  |
| C | 1.400028  | 5.518655  | 3.924413  |
| C | 0.682458  | 4.328424  | 4.157289  |
| C | 0.661048  | 3.314070  | 3.185906  |
| H | -4.158273 | 1.163569  | 0.044508  |
| H | -0.933270 | 3.070257  | -2.612237 |
| H | -1.826611 | 4.620074  | -4.371916 |
| H | -4.296857 | 4.698781  | -4.837248 |
| H | -5.855099 | 3.222022  | -3.530575 |
| H | -4.968055 | 1.693254  | -1.787255 |
| H | -2.335343 | -2.162955 | 2.631790  |
| H | -3.877216 | -3.055734 | 4.398656  |
| H | -6.029127 | -1.858612 | 4.907383  |
| H | -6.617930 | 0.231476  | 3.641428  |
| H | -5.092964 | 1.109754  | 1.891130  |
| H | 1.077122  | -4.166721 | 0.036451  |
| H | -0.260341 | -5.476354 | -0.826794 |
| H | -1.191695 | -7.014570 | -2.537259 |
| H | -2.167158 | -6.105001 | -4.667222 |
| H | -2.202873 | -3.621305 | -5.057645 |
| H | -1.262907 | -2.067586 | -3.325370 |
| H | 2.082633  | -1.143472 | 3.353996  |
| H | 3.664557  | -2.009535 | 5.100568  |
| H | 4.852681  | -4.196436 | 4.742360  |
| H | 4.446079  | -5.501218 | 2.633262  |
| H | 2.879906  | -4.643151 | 0.909601  |
| H | 3.096653  | 3.002686  | -0.067896 |
| H | 4.879418  | 2.436087  | -0.952063 |
| H | 6.638688  | 2.367916  | -2.702949 |
| H | 6.254189  | 1.101921  | -4.840151 |
| H | 4.078089  | -0.105495 | -5.196547 |
| H | 2.303140  | -0.037834 | -3.422528 |
| H | 2.610737  | 4.829913  | 0.790917  |
| H | 2.646489  | 6.617868  | 2.514416  |
| H | 1.414756  | 6.314731  | 4.683790  |
| H | 0.134614  | 4.190971  | 5.101523  |
| H | 0.097830  | 2.387239  | 3.356160  |
